# Supplementary material for: The effect of health insurance coverage on antenatal care utilization in Cambodia: A secondary analysis of Cambodia Demographic and Health Survey 2021–2022
Source: PubMed Central journal article supplement (PMC11534221; doi:10.1371/journal.pgph.0002954), 2024-11-04
Supplement: pgph.0002954.s004.pdf [file pgph.0002954.s004.pdf]

# PLOS Global Public Health

## The effect of health insurance coverage on antenatal care utilization in Cambodia: A secondary analysis of Cambodia Demographic and Health Survey 2021-2022 --Manuscript Draft--

|                                                                                                                                                                                                                 |                                                                                                                                                                                                                                                                                                                                                                                                                                                                                                                                                                                                                                                                                                                                                                                                                                                                                                                                                                                                                                                                                                                                                                                                                                                                                                                                                                                                                                                                                                                                                                                                                                                                                                                                                                                                                                                          |
|-----------------------------------------------------------------------------------------------------------------------------------------------------------------------------------------------------------------|----------------------------------------------------------------------------------------------------------------------------------------------------------------------------------------------------------------------------------------------------------------------------------------------------------------------------------------------------------------------------------------------------------------------------------------------------------------------------------------------------------------------------------------------------------------------------------------------------------------------------------------------------------------------------------------------------------------------------------------------------------------------------------------------------------------------------------------------------------------------------------------------------------------------------------------------------------------------------------------------------------------------------------------------------------------------------------------------------------------------------------------------------------------------------------------------------------------------------------------------------------------------------------------------------------------------------------------------------------------------------------------------------------------------------------------------------------------------------------------------------------------------------------------------------------------------------------------------------------------------------------------------------------------------------------------------------------------------------------------------------------------------------------------------------------------------------------------------------------|
| <b>Manuscript Number:</b>                                                                                                                                                                                       | PGPH-D-24-00222R1                                                                                                                                                                                                                                                                                                                                                                                                                                                                                                                                                                                                                                                                                                                                                                                                                                                                                                                                                                                                                                                                                                                                                                                                                                                                                                                                                                                                                                                                                                                                                                                                                                                                                                                                                                                                                                        |
| <b>Article Type:</b>                                                                                                                                                                                            | Research Article                                                                                                                                                                                                                                                                                                                                                                                                                                                                                                                                                                                                                                                                                                                                                                                                                                                                                                                                                                                                                                                                                                                                                                                                                                                                                                                                                                                                                                                                                                                                                                                                                                                                                                                                                                                                                                         |
| <b>Full Title:</b>                                                                                                                                                                                              | The effect of health insurance coverage on antenatal care utilization in Cambodia: A secondary analysis of Cambodia Demographic and Health Survey 2021-2022                                                                                                                                                                                                                                                                                                                                                                                                                                                                                                                                                                                                                                                                                                                                                                                                                                                                                                                                                                                                                                                                                                                                                                                                                                                                                                                                                                                                                                                                                                                                                                                                                                                                                              |
| <b>Short Title:</b>                                                                                                                                                                                             | The effect of health insurance coverage on antenatal care utilization in Cambodia                                                                                                                                                                                                                                                                                                                                                                                                                                                                                                                                                                                                                                                                                                                                                                                                                                                                                                                                                                                                                                                                                                                                                                                                                                                                                                                                                                                                                                                                                                                                                                                                                                                                                                                                                                        |
| <b>Corresponding Author:</b>                                                                                                                                                                                    | Samnang Um, MSc<br>NIPH: National Institute of Public Health<br>Phnom Penh, Cambodia CAMBODIA                                                                                                                                                                                                                                                                                                                                                                                                                                                                                                                                                                                                                                                                                                                                                                                                                                                                                                                                                                                                                                                                                                                                                                                                                                                                                                                                                                                                                                                                                                                                                                                                                                                                                                                                                            |
| <b>Order of Authors:</b>                                                                                                                                                                                        | Samnang Um, MSc<br>Channnarong Phan, MSc<br>Khun Vaha, MD<br>Soklim Pay, MPH<br>Darapheak Chau, MD,PhD                                                                                                                                                                                                                                                                                                                                                                                                                                                                                                                                                                                                                                                                                                                                                                                                                                                                                                                                                                                                                                                                                                                                                                                                                                                                                                                                                                                                                                                                                                                                                                                                                                                                                                                                                   |
| <b>Keywords:</b>                                                                                                                                                                                                | Key work: Health insurance; Antenatal care utilization; Pregnant women; Cambodia                                                                                                                                                                                                                                                                                                                                                                                                                                                                                                                                                                                                                                                                                                                                                                                                                                                                                                                                                                                                                                                                                                                                                                                                                                                                                                                                                                                                                                                                                                                                                                                                                                                                                                                                                                         |
| <b>Abstract:</b>                                                                                                                                                                                                | Health insurance is essential in reducing or eliminating the financial constraint to accessing maternal health services caused by out-of-pocket payments. Also, it has a beneficial effect in minimizing the number of maternal and child mortality. However, limited studies in Cambodia examined the association between health insurance coverage on antenatal care (ANC) utilization. Therefore, this study examined the effect of health insurance coverage on ANC utilization in Cambodia. The study utilized women's data from the 2021-2022 Cambodia Demographic and Health Surveys (CDHS). A total of 3,162 weighted women who gave birth within two years were included in the study. Multiple logistic regression analysis was explored to assess the association between health insurance coverage on women who attended four or more ANC visits. About 24.9% of the women had health insurance coverage during 2021-2022. Most (86.1%) of women attended at least four ANC visits. Women with health insurance coverage were statistically significantly associated with attending four or more ANC visits with an adjusted odds ratio (AOR = 1.6; 95% CI: 1.1–2.4). Other covariates significantly associated with women who attended four or more ANC visits include women with higher education (AOR = 3.1; 95% CI: 1.2–7.7), secondary education (AOR = 2.3; 95% CI: 1.5–3.5), richest households (AOR = 3.2; 95% CI: 1.5–6.8), and richer households (AOR = 1.9; 95% CI: 1.2–2.8). Pregnant women with health insurance coverage, who had completed at least secondary education and had a better wealth index were more likely to attend at least four ANC visits. Thus, improving health insurance coverage, economics, and education may be essential to improving women's access to attended ANC utilization services in Cambodia. |
| <b>Additional Information:</b>                                                                                                                                                                                  |                                                                                                                                                                                                                                                                                                                                                                                                                                                                                                                                                                                                                                                                                                                                                                                                                                                                                                                                                                                                                                                                                                                                                                                                                                                                                                                                                                                                                                                                                                                                                                                                                                                                                                                                                                                                                                                          |
| <b>Question</b>                                                                                                                                                                                                 | <b>Response</b>                                                                                                                                                                                                                                                                                                                                                                                                                                                                                                                                                                                                                                                                                                                                                                                                                                                                                                                                                                                                                                                                                                                                                                                                                                                                                                                                                                                                                                                                                                                                                                                                                                                                                                                                                                                                                                          |
| <b>Financial Disclosure</b>                                                                                                                                                                                     | The authors received no specific funding for this work.                                                                                                                                                                                                                                                                                                                                                                                                                                                                                                                                                                                                                                                                                                                                                                                                                                                                                                                                                                                                                                                                                                                                                                                                                                                                                                                                                                                                                                                                                                                                                                                                                                                                                                                                                                                                  |
| Enter a financial disclosure statement that describes the sources of funding for the work included in this submission and the role the funder(s) played. This includes grants and any commercial funding of the |                                                                                                                                                                                                                                                                                                                                                                                                                                                                                                                                                                                                                                                                                                                                                                                                                                                                                                                                                                                                                                                                                                                                                                                                                                                                                                                                                                                                                                                                                                                                                                                                                                                                                                                                                                                                                                                          |

|                                                                                                                                                                                                                                                                                                                                                                                                                                                                                                                                                                                                                                 |                                                                                                                                                                                                                   |
|---------------------------------------------------------------------------------------------------------------------------------------------------------------------------------------------------------------------------------------------------------------------------------------------------------------------------------------------------------------------------------------------------------------------------------------------------------------------------------------------------------------------------------------------------------------------------------------------------------------------------------|-------------------------------------------------------------------------------------------------------------------------------------------------------------------------------------------------------------------|
| <p>work or authors.</p> <p>This statement will be typeset if the manuscript is accepted for publication.</p> <p><i>Please review the <a href="#">submission guidelines</a> and the instructions link below for detailed requirements and guidance.</i></p>                                                                                                                                                                                                                                                                                                                                                                      |                                                                                                                                                                                                                   |
| <p><b>Competing Interests</b></p> <p>On behalf of all authors, disclose any competing interests that could be perceived to bias this work.</p> <p>This statement will be typeset if the manuscript is accepted for publication.</p> <p><i>Please review the instructions link below and PLOS Global Public Health's <a href="#">competing interests</a> policy to determine what information must be disclosed at submission.</i></p>                                                                                                                                                                                           | <p>The authors have declared that no competing interests exist.</p>                                                                                                                                               |
| <p><b>Data Availability</b></p> <p>Before publication, Authors are required to make fully available and without restriction all data underlying their findings. Please see our <a href="#">PLOS Data Policy</a> page for detailed information on this policy.</p> <p>A <b>Data Availability Statement</b>, detailing where the data can be accessed, is required at first submission. Insert your Data Availability Statement in the box below.</p> <p>Please see the <a href="#">data reporting</a> section of our submission guidelines for instructions on what you need to include in your Data Availability Statement.</p> | <p>The Cambodia Demographic and Health Survey data are publicly available from the website: (URL: <a href="https://www.dhsprogram.com/data/dataset_admin">https://www.dhsprogram.com/data/dataset_admin</a>).</p> |

This statement will be typeset if the manuscript is accepted for publication.

*PLOS allows rare exemptions to address legal and ethical concerns. If you have legal or ethical restrictions, please use the box below to detail these in full sentences for the Journal team to consider.*

## The effect of health insurance coverage on antenatal care utilization in Cambodia: A secondary analysis of Cambodia Demographic and Health Survey 2021-2022

Samnang Um<sup>1,2\*</sup>, Channnarong Phan<sup>1</sup>, Khun Vaha<sup>3</sup>, Soklim Pay<sup>4</sup>, Darapheak Chau<sup>1</sup>

1- National Institute of Public Health, Cambodia

2- Faculty of Social Science and Humanities, Royal University of Phnom Penh, Cambodia

3- Department of Payment Certification of National Payment Certification Agency, Cambodia

4- Technical Department of National Pediatric Hospital, Cambodia

\* [umsam nang56@gmail.com](mailto:umsam nang56@gmail.com)

### Abstract

Health insurance is essential in reducing or eliminating the financial constraint to accessing maternal health services caused by out-of-pocket payments. Also, it has a beneficial effect in minimizing the number of maternal and child mortality. However, limited studies in Cambodia examined the association between health insurance coverage on antenatal care (ANC) utilization. Therefore, this study examined the effect of health insurance coverage on ANC utilization in Cambodia. The study utilized data from the 2021-2022 Cambodia Demographic and Health Surveys (CDHS). A total of 3,162 weighted women who gave birth within two years were included in the study. Multiple logistic regression analysis was explored to assess the association between health insurance coverage on women who attended four or more ANC visits. About 24.9% of the women had health insurance coverage during 2021-2022. Most (86.1%) of women attended four or more ANC visits. Women with health insurance coverage were statistically significantly associated with attending four or more ANC visits with an adjusted odds ratio (AOR = 1.6; 95% CI: 1.1–2.4). Other covariates significantly associated with women who attended four or more ANC visits include women with higher education (AOR = 3.1; 95% CI: 1.2–7.7), secondary education (AOR = 2.3; 95% CI: 1.5–3.5), richest households (AOR = 3.2; 95% CI: 1.5-6.8), and richer households (AOR = 1.9; 95% CI: 1.2-2.8). Pregnant women with health insurance coverage, who had completed at least secondary education and had a better wealth index were more likely to attend at least four ANC visits. Thus, improving health insurance coverage, and women's economic and education may be essential to improving women's access to attended ANC utilization services in Cambodia.

**Key work:** Health insurance, Antenatal care utilization, Pregnant women, Cambodia

36 **Introduction**

37

38 Cambodia's maternal mortality rate has significantly declined in the past decade. Data from the  
39 2021-2022 Cambodia Demographic and Health Surveys (CDHS) show that maternal mortality had  
40 declined dramatically, from 488 to 154 per 100,000 live births between 2000 and 2021-2022 [1,2].  
41 By 2030, the global maternal death ratio is expected to drop to less than 70 per 100,000 live births,  
42 according to Sustainable Development Goal (SDG) 3.1[3]. This achievement can be attributed to  
43 the country's concerted effort to increase women's access to maternal health services, particularly  
44 the initiative to increase institutional births [4]. Institutional births dramatically increased, from  
45 19.3% to 98%, while the proportion of pregnant women attending four or more antenatal care  
46 (ANC) appointments increased considerably, from 9% to 86.1%, between 2000 and 2021-2022 [5].  
47 In several studies, women who had health insurance had higher rates of using maternal health  
48 treatments, such as timely ANC and attending four or more ANC visits [6-9].

49

50 In 2019, the total population of Cambodia was 15.55 million, with 17.8% living below the national  
51 poverty line [10]. Since 2016, Cambodia has been classified as a lower-middle-income country,  
52 with gross domestic product (GDP) per capita from 302 US dollars in 2000 to 1,625 US dollars in  
53 2021 [11]. Also, current expenditures on health per capita significantly increased from 20 US  
54 dollars in 2000 to 116 US dollars in 2020 [12]. Globally, 50% of people cannot access essential  
55 health services, as the World Bank and World Health Organization (WHO) reported in 2017 [13].

56

57 Cambodian National Social Security Fund (NSSF) has provided health insurance coverage to  
58 formal sector workers [14]. And poor households are covered by the Health Equity Fund (HEF),  
59 the co-financing mechanism of the government and development partners [15]. By 2025, the  
60 government intends to expand the reach of the NSSF health insurance program to include the entire  
61 population [16]. Data from CDHS 2021-2022 indicated that 22% of women and 13% of men aged  
62 15-49 years have any health insurance, respectively [5]. Health insurance coverage is expected to  
63 provide financial risk protection and reduce disparities in access by facilitating greater uptake of  
64 maternal health services [13]. To our knowledge, limited published peer-reviewed studies assess  
65 the association between health insurance coverage and access to maternal health services among  
66 women of reproductive age in Cambodia using updated data. One prior study on health insurance

67 coverage and its impact on maternal healthcare utilization in low- and middle-income countries  
68 utilized data from CDHS 2010 [8]. This study included all women and men aged 15-49 and pooled  
69 Demographic and Health Survey (DHS) data in 30 low-and middle-income countries (LMICs) [8].  
70 An additional study aimed to assess levels of health insurance coverage in 30 LMICs and examines  
71 the impact of health insurance status on the use of maternal health care in eight countries spanning  
72 sub-Saharan Africa (Burundi et al., Namibia, and Rwanda), West Asia (Albania), and South and  
73 Southeast Asia (Cambodia and Indonesia) [8]. Several pieces of evidence on the effect of health  
74 insurance coverage on ANC utilization have been published [6-9,17-19]; results indicate that  
75 women with health insurance coverage had higher odds attended four or more ANC visits than  
76 those without [6-9,17-19]. Moreover, those women who reported exposure to media, married  
77 women, those with high education, those living in wealthy economic families, those who are  
78 unemployed, and those living in urban areas were also factors associated with attending four or  
79 more ANC visits [6-9,17-19]. Given the lack of scholarship addressing this health concern among  
80 Cambodian women aged 15-49, we examined the effects of health insurance coverage on antenatal  
81 care (ANC) utilization among women who had a live birth in the past two years in Cambodia. The  
82 findings will provide a broader perspective on levels of health insurance coverage and the impact  
83 of health insurance status on the use of maternal health care in Cambodia. Additionally, the study  
84 will enable policymakers to understand better health insurance coverage among the adult  
85 population in Cambodia and proffer suggestions for improving universal health coverage in  
86 Cambodia.

87

## 88 **Material and Methods**

89

### 90 **Ethical statement**

91

92 The CDHS 2021–2022 is publicly available, with all personal identifiers of study participants  
93 removed. Permission to analyze the data was granted by registering with the DHS program website  
94 at (URL: <https://dhsprogram.com/data/available-datasets.cfm>). Written informed consent was  
95 obtained from the parent/guardian of each participant under 18 before data collection. The  
96 Cambodia National Ethics Committee for Human Health Research (NECHR) approved the data  
97 collection tools and procedures for CHDS 2021-2022 for Health Research on 10 May 2021

98 (Reference number: 83 NECHR) and ICF's Institutional Review Board (IRB) in Rockville,  
99 Maryland, USA.

100

### 101 **Data source**

102

103 We used data from the most recent CDHS (2021–2022), a household survey conducted every five  
104 years nationally representative of the population [5]. The two-stage stratified cluster sampling  
105 method collected the samples from all provinces. At the first stage, clusters, or enumeration areas  
106 (EAs), that represent the entire country (urban and rural), are randomly selected from the sampling  
107 frame using probability proportional (PPS) to cluster size. In the second stage, a complete listing  
108 of households was selected from each cluster using an equal probability systematic sampling, and  
109 then interviews were conducted with women aged 15–49 years who were born in the five years  
110 preceding the survey in the complete list selected households [5]. In total, 19,496 women aged 15-  
111 49 who had given birth in the last five years were interviewed face-to-face, using the survey  
112 standard questionnaire to collect information from women on several health indicators such as  
113 maternal health care service utilization, maternal and child health, nutrition, and reproductive  
114 health services [5]. Overall, 15,046 women who had not given birth in the past two years were  
115 excluded. Data restriction resulted in women who had a live birth in the past two years in a final  
116 analytic sample of 3,292 women (3,162 weighted women).

117

### 118 **Measurements**

119

#### 120 **Outcome variable**

121

122 This study's outcome was the number of ANC visits during the last pregnancy among women aged  
123 15-49 years (coded as 0 = less than 4 ANC visits included women who reported no ANC visits and  
124 1 = four or more ANC visits) [6,18,20].

125

#### 126 **Independent variables**

127

128 The primary independent variable is maternal health insurance coverage (coded as 0=no (reference  
129 and 1=yes), including public and private insurance. The confounding variables included maternal  
130 factors: Women's age in years (coded as 1=15-30 (reference) and 2=31-49), marital status (coded  
131 as 1=married (reference) and 2=not married), birth order (coded as 1=1 (reference), 2=2-3, and

132 3=4 or more), education (coded as 0 = no education (reference), 1=primary, and 2=secondary or  
133 higher), occupation (coded as 0=not working (reference), 1=professional, 2=sales or services,  
134 3=agricultural, and 4=manual labor). Individual Household factors included the household wealth  
135 index (coded as 1=poorest (reference), 2=poorest, 3=medium, 4=richer, and 5=richest) were  
136 calculated following the principal component analysis (PCA) [5]. Cambodia's geographical  
137 regions were grouped into four categories (coded as 1=Plains (reference), 2=Tonle Sap,  
138 3=Coastal/Sea, and 4=Mountains), and place of residences (coded as 1=urban (reference) and  
139 2=rural) was defined based on Cambodia's General Population Census 2019 and adapted from the  
140 original CDHS 2021-2022 [5,10].

141

## 142 **Statistical analysis**

143

144 Statistical analysis was performed using STATA version 17 (StataCorp LLC). We applied for the  
145 DHS standard sampling weight variable (**v005/1,000,000**). Then, we used the survey-specific  
146 STATA command "**svy**" for descriptive and analytical analysis. Women's socio-economic and  
147 demographic characteristics were described using weighted frequency and percentage  
148 distributions.

149 Bivariate analysis using Chi-square tests assessed the association between the variables of interest  
150 (maternal and individual household characteristics) and ANC visits. All independent variables  
151 associated with ANC use at p-value  $\leq 0.10$ , or that had a potential confounder variable [6,18] were  
152 included in the multiple logistic regression analysis to determine the independent factors related  
153 to ANC use [26]. Multicollinearity between original independent variables was checked, including  
154 women's age, number of children ever born, education, wealth index, occupation, marital status,  
155 coverage health insurance, and place of residence. The result of the evaluating variance inflation  
156 factor (VIF) scores after fitting an Ordinary Least Squares regression model with the mean value  
157 of VIF was 1.53, which is less than the cutoff point indicating no collinearity correlation among  
158 the independent variables [27].

159



160 **Results**

161

162 **Characteristics of the study population**

163

164 **Table 1** describes the socio-economic and demographic characteristics of the 3,162 women aged  
 165 15–49 born in the last two years preceding the survey. The mean age was 22.2 years old (SD = 4.2  
 166 years); the age group of 15–29 years old accounted for 94.3%. The majority (95%) were currently  
 167 married. More than 33.4% of women had their first child. Half of the women completed at least  
 168 secondary education, while 10.6% had no formal education. Only 6.5% of workers were  
 169 professionals, and 31.2% were unemployed. Of the sample, 20.7% of women were from the  
 170 poorest households, and 19.7% were from poorer households. Sixty-two percent of the women  
 171 lived in rural areas. Only 786 (24.9%) women aged 15–49 had health insurance coverage. 86.1%  
 172 of women attended at least four ANC visits during pregnancy.

173

174 **Table 1.** Socio-economic and demographic characteristics of women aged 15-49 years with a birth in the  
 175 last two years preceding the survey (N = 3,162 weighted)  
 176

| Variables                                 | Freq.     | %    |
|-------------------------------------------|-----------|------|
| <b>Mean age at the time of birth (SD)</b> | 22.2(4.2) |      |
| 15-29                                     | 2,982     | 94.3 |
| 30-49                                     | 180       | 5.7  |
| <b>Marital status</b>                     |           |      |
| Married                                   | 3,004     | 95.0 |
| Not married                               | 158       | 5.0  |
| <b>Birth order</b>                        |           |      |
| 1 child                                   | 1055      | 33.4 |
| 2-3 children                              | 1197      | 37.9 |
| 4 or more children                        | 909       | 28.7 |
| <b>Educational</b>                        |           |      |
| No education                              | 334       | 10.6 |
| Primary                                   | 1253      | 39.6 |
| Secondary                                 | 1361      | 43.0 |
| Higher                                    | 214       | 6.8  |
| <b>Occupation</b>                         |           |      |
| Not working                               | 986       | 31.2 |
| Professional                              | 205       | 6.5  |
| Sales                                     | 579       | 18.3 |
| Agricultural                              | 445       | 14.1 |
| Services                                  | 76        | 2.4  |
| Manual labor                              | 810       | 25.6 |
| <b>Wealth index</b>                       |           |      |
| Poorest                                   | 655       | 20.7 |

|                                    |      |             |
|------------------------------------|------|-------------|
| Poorer                             | 623  | 19.7        |
| Middle                             | 626  | 19.8        |
| Richer                             | 683  | 21.6        |
| Richest                            | 574  | 18.2        |
| <b>Residence</b>                   |      |             |
| Urban                              | 1202 | 38.0        |
| Rural                              | 1960 | 62.0        |
| <b>Region</b>                      |      |             |
| Plain                              | 1532 | 48.5        |
| Tonle Sap                          | 996  | 31.5        |
| Coastal                            | 201  | 6.4         |
| Plateau/Mountain                   | 432  | 13.7        |
| <b>Covered by health insurance</b> |      |             |
| No                                 | 2376 | 75.1        |
| Yes                                | 786  | 24.9        |
| <b>Number of ANC visits</b>        |      |             |
| < 4 ANC                            | 440  | 13.9        |
| ≥ 4 ANC                            | 2722 | <b>86.1</b> |

**Notes:** Survey weights are applied to obtain weighted percentages. \***Plains:** Phnom Penh, Kampong Cham, Tbong Khmum, Kandal, Prey Veng, Svay Rieng, and Takeo; **Tonle Sap:** Banteay Meanchey, Kampong Chhnang, Kampong Thom, Pursat, Siem Reap, Battambang, Pailin, and Otdar Meanchey; **Coastal/sea:** Kampot, Kep, Preah Sihanouk, and Koh Kong; **Mountains:** Kampong Speu, Kratie, Preah Vihear, Stung Treng, Mondul Kiri, and Ratanak Kiri.

### Factors Associated with Four or more ANC visits in Chi-Square analysis

In bivariate analysis (**Table 3**), a higher proportion of women with health insurance coverage had a significant association with four or more ANC visits (91.6% vs. 84.2%,  $p < 0.001$ ). Women aged 31–49 reported being more likely to attend four or more ANC visits (88.0% vs. 86.0%,  $p < 0.001$ ). Also, married women reported four or more ANC visits than nonmarried women (86.6% vs. 76.2%,  $p = 0.007$ ). Women with no education were less likely to attend four or more ANC visits than those with higher education (71.0% vs. 95.6%,  $p < 0.001$ ). Four or more ANC visits were higher among women working in professional (95.3%) and service (96.4%), respectively, compared to unemployed women (84.3), with  $p < 0.001$ . Additionally, four or more ANC visits were higher among women from the richer and richest on the wealth index (94.8 and 89.4%, respectively), compared to the poorer and poorest (73.9 and 86.9%, respectively, with  $p < 0.001$ ). Lastly, women living in urban areas reported higher four or more ANC visits than in rural areas (91.5 vs. 82.7%,  $p < 0.001$ ).

**Table 3.** Maternal and household characteristics by women attending at least four antenatal care and delivery in a health facility (N = 3,162)

| Variables                          | Number of ANC visits    |                         | p-value |
|------------------------------------|-------------------------|-------------------------|---------|
|                                    | Four or more<br>n=2,722 | Less than four<br>n=440 |         |
|                                    | %                       | %                       |         |
| <b>Covered by health insurance</b> |                         |                         |         |
| No                                 | 84.2                    | 15.8                    | <0.001  |
| Yes                                | 91.6                    | 8.4                     |         |
| <b>Age at time of birth</b>        |                         |                         |         |
| 15-30                              | 86.0                    | 14.0                    | <0.001  |
| 31-49                              | 88.0                    | 12.0                    |         |
| <b>Marital status</b>              |                         |                         |         |
| Married                            | 86.6                    | 13.4                    | 0.007   |
| Not married                        | 76.2                    | 23.8                    |         |
| <b>Birth order</b>                 |                         |                         |         |
| 1 child                            | 88.4                    | 11.6                    | <0.001  |
| 2-3 children                       | 88.6                    | 11.4                    |         |
| 4 or more children                 | 80.1                    | 19.9                    |         |
| <b>Educational</b>                 |                         |                         |         |
| No education                       | 71.0                    | 29.0                    | <0.001  |
| Primary                            | 84.1                    | 15.9                    |         |
| Secondary                          | 90.1                    | 9.9                     |         |
| Higher                             | 95.6                    | 4.4                     |         |
| <b>Occupation</b>                  |                         |                         |         |
| Not working                        | 84.3                    | 15.7                    | <0.001  |
| Professional                       | 95.3                    | 4.7                     |         |
| Sales                              | 84.4                    | 15.6                    |         |
| Agricultural                       | 79.0                    | 21.0                    |         |
| Services                           | 96.4                    | 3.6                     |         |
| Manual labor                       | 89.9                    | 10.1                    |         |
| <b>Wealth index</b>                |                         |                         |         |
| Poorest                            | 73.9                    | 26.1                    | <0.001  |
| Poorer                             | 86.9                    | 13.1                    |         |
| Middle                             | 86.3                    | 13.7                    |         |
| Richer                             | 89.4                    | 10.6                    |         |
| Richest                            | 94.8                    | 5.2                     |         |
| <b>Residence</b>                   |                         |                         |         |
| Urban                              | 91.5                    | 8.5                     | <0.001  |
| Rural                              | 82.7                    | 17.3                    |         |
| <b>Region</b>                      |                         |                         |         |
| Plain                              | 89.3                    | 10.7                    | <0.001  |
| Tonle Sap                          | 86.6                    | 13.4                    |         |
| Coastal                            | 89.0                    | 11.0                    |         |
| Plateau/Mountain                   | 72.2                    | 27.8                    |         |

**Notes:** Survey weights are applied to obtain weighted percentages. \***Plains:** Phnom Penh, Kampong Cham, Tbong Khmum, Kandal, Prey Veng, Svay Rieng, and Takeo; **Tonle Sap:** Banteay Meanchey, Kampong Chhnang, Kampong Thom, Pursat, Siem Reap, Battambang, Pailin, and Otdar Meanchey; **Coastal/sea:** Kampot, Kep, Preah Sihanouk, and Koh Kong; **Mountains:** Kampong Speu, Kratie, Preah Vihear, Stung Treng, Mondul Kiri, and Ratanak Kiri.

203  
204  
205  
206  
207

208  
209  
210

211 **Association between health insurance and maternal Healthcare Services Utilization**

212

213 **Table 4** shows the results of the multiple logistic regression analysis of the association between

214 health insurance coverage and maternal healthcare services utilization after controlling for the

215 socio-demographic factors. Compared to women without health insurance, those with health

216 insurance coverage were more likely to attend four or more ANC visits (AOR = 1.6, 95% CI: 1.1–

217 2.4). Women with higher education (AOR = 3.1, 95% CI: 1.2–7.7), secondary education (AOR =

218 2.3, 95% CI: 1.5–3.5), and primary education (AOR = 1.7, 95% CI: 1.2–2.7) were more likely to

219 have four or more ANC visits than women without any formal education. The odds of having four

220 or more ANC visits were more significant for women from the wealthiest households than for

221 those from the poorest households: richest households (AOR = 3.2; 95% CI: 1.5-6.8), richer

222 households (AOR = 1.9; 95% CI: 1.2-2.8), and middle households (AOR = 1.5; 95% CI: 1.1-2.2).

223 However, the odds of having four or more ANC visits were lower in unmarried women than in

224 married women (AOR = 0.5; 95% CI: 0.3-0.8).

225

226 **Table 4.** Association between health insurance and four or more ANC visits in simple and multiple logistic

227 regression model (N = 3,162)

| Variables                          | Four or more ANC visits |            |               |                  |
|------------------------------------|-------------------------|------------|---------------|------------------|
|                                    | Unadjusted              |            | Adjusted      |                  |
|                                    | OR                      | 95% CI     | AOR           | 95% CI           |
| <b>Covered by health insurance</b> |                         |            |               |                  |
| No                                 | Ref.                    |            | Ref.          |                  |
| Yes                                | 2.0***                  | (1.4-2.9)  | <b>1.6*</b>   | <b>(1.1-2.4)</b> |
| <b>Age at time of birth</b>        |                         |            |               |                  |
| 15-30                              | Ref.                    |            | Ref.          |                  |
| 31-49                              | 1.2                     | (0.7-2.1)  | 1.1           | (0.6-2.0)        |
| <b>Marital status</b>              |                         |            |               |                  |
| Married                            | Ref.                    |            | Ref.          |                  |
| Not married                        | 0.5**                   | (0.3-0.8)  | <b>0.5**</b>  | <b>(0.3-0.8)</b> |
| <b>Birth order</b>                 |                         |            |               |                  |
| 1child                             | Ref.                    |            | Ref.          |                  |
| 2-3 children                       | 1.0                     | (0.8-1.4)  | 1.1           | (0.8-1.5)        |
| 4 or more children                 | 0.5***                  | (0.4-0.7)  | 0.7*          | (0.5-1.0)        |
| <b>Educational</b>                 |                         |            |               |                  |
| No education                       | Ref.                    |            | Ref.          |                  |
| Primary                            | 2.2***                  | (1.5-3.1)  | <b>1.8**</b>  | <b>(1.2-2.7)</b> |
| Secondary                          | 3.7***                  | (2.6-5.3)  | <b>2.3***</b> | <b>(1.5-3.5)</b> |
| Higher                             | 8.9***                  | (4.3-18.3) | <b>3.1*</b>   | <b>(1.2-7.7)</b> |
| <b>Occupation</b>                  |                         |            |               |                  |
| Not working                        | Ref.                    |            | Ref.          |                  |
| Professional                       | 3.8***                  | (2.0-7.0)  | 1.4           | (0.7-2.8)        |

|                     |        |            |        |           |
|---------------------|--------|------------|--------|-----------|
| Sales               | 1.0    | (0.7-1.4)  | 0.7    | (0.5-1.0) |
| Agricultural        | 0.7*   | (0.5-1.0)  | 1.0    | (0.7-1.4) |
| Services            | 4.9**  | (1.8-13.5) | 2.6    | (0.9-7.2) |
| Manual labor        | 1.7**  | (1.2-2.3)  | 1.3    | (0.9-1.9) |
| <b>Wealth index</b> |        |            |        |           |
| Poorest             | Ref.   |            | Ref.   |           |
| Poorer              | 2.4*** | (1.7-3.2)  | 1.7**  | (1.2-2.3) |
| Middle              | 2.2*** | (1.6-3.1)  | 1.5*   | (1.1-2.2) |
| Richer              | 3.0*** | (2.1-4.2)  | 1.9**  | (1.2-2.8) |
| Richest             | 6.4*** | (3.4-12.0) | 3.2**  | (1.5-6.8) |
| <b>Residence</b>    |        |            |        |           |
| Urban               | Ref.   |            | Ref.   |           |
| Rural               | 0.4*** | (0.3-0.6)  | 0.8    | (0.5-1.1) |
| <b>Region</b>       |        |            |        |           |
| Plain               | Ref.   |            | Ref.   |           |
| Tonle Sap           | 0.8    | (0.6-1.1)  | 1.2    | (0.9-1.7) |
| Coastal             | 1.0    | (0.6-1.5)  | 1.3    | (0.8-2.1) |
| Plateau/Mountain    | 0.3*** | (0.2-0.4)  | 0.5*** | (0.3-0.6) |

Ref = reference value

\*  $p < 0.05$ , \*\*  $p < 0.01$ , \*\*\*  $p < 0.001$

**Notes:** Survey weights are applied to obtain weighted percentages. \***Plains:** Phnom Penh, Kampong Cham, Tbong Khmum, Kandal, Prey Veng, Svay Rieng, and Takeo; **Tonle Sap:** Banteay Meanchey, Kampong Chhnang, Kampong Thom, Pursat, Siem Reap, Battambang, Pailin, and Otdar Meanchey; **Coastal/sea:** Kampot, Kep, Preah Sihanouk, and Koh Kong; **Mountains:** Kampong Speu, Kratie, Preah Vihear, Stung Treng, Mondul Kiri, and Ratanak Kiri.

## Discussion

We analyzed the most recent 2021–2022 CDHS data to examine the relationship between health insurance coverage and receiving four or more ANC visits during pregnancy. Overall, 24.9% of women reported having health insurance coverage among women of reproductive age who gave birth within two years of the survey. This finding is slightly similar to lower-middle-income countries, where 27.3% of women had health insurance coverage [19]. This is higher than in low-income countries, where 7.9% of women have health insurance coverage [19]. However, lower than in upper-middle-income countries, 52.5% of women had health insurance coverage [19]. Since the formal launch of the Cambodia National Social Security Fund (NSSF) with the Health Insurance Scheme in 2008, the proportion of women with health insurance coverage has increased from 16% in 2014 to 22% in 2021–2022 [5]. This proportion exponentially increased due to the Royal Government of Cambodia’s implementation of the NSSF for all workers in the formal and informal sectors of the economy [10]. Moreover, it has plans to extend the healthcare benefits under the NSSF to the family members of the employees as well [16].

253 This study found that women with health insurance coverage were 1.6 times more likely to attend  
254 four or more ANC visits during pregnancy. Previous studies documented the positive relationship  
255 between health insurance and the number of ANC visits among women of reproductive age  
256 [8,9,19]. Health insurance eliminates the financial barrier to accessing maternal health services  
257 caused by out-of-pocket payments. It has a beneficial effect in reducing the number of low-birth-  
258 weight babies born and child mortality [17,21]. The result is more equitable access to care,  
259 potentially improving maternal health outcomes [9,19]. The MoH has since raised the minimum  
260 standard for ANC visits during pregnancy to at least four trips [20,22]. The dramatically significant  
261 increase in the highest prevalence of four or more ANC visits was an effort by the Royal  
262 Government of Cambodia, which has strengthened health facilities across the country, particularly  
263 in rural areas, improved infrastructure, provided essential medical equipment and supplies,  
264 increased the number of midwives, expanded antenatal care, and provided more skilled medical  
265 practitioners at childbirth to ensure safe delivery practices. Furthermore, to encourage early and  
266 routine ANC visits, the government is offering pregnant women a monetary incentive of 20 US  
267 dollars for each visit during a maximum of four ANC visits at any health facility with a contract  
268 with the National Social Security Fund (NSSF) [14,23].

269  
270 This study found that increased education and household wealth index increased the likelihood of  
271 four or more ANC visits. Women's education and higher wealth index are more likely to attend  
272 four or more ANC visits. This aligns with previous evidence around socio-economic inequalities  
273 in maternal health service utilization in Cambodia and South Asia [24,25]. This may be because  
274 the more educated women is the more aware of the importance of ANC for their health and baby  
275 [26]. Additionally, education gives women the power to decide whether to seek medical attention  
276 and enables them to recognize warning signs of pregnancy complications. Moreover, women from  
277 higher-income households were more likely to be able to cover the costs of care-seeking, including  
278 any related expenses and transportation [24,25]. Thus, in this study, women with higher education  
279 levels and household wealth indexes had the highest proportion of health insurance coverage.

280  
281 This study has several strengths. First, it used the most recent women's data from the 2021–2022  
282 CDHS, an extensive representative national population-based household survey with a high  
283 response rate of 97%. Second, the recall bias has been minimized by limited analysis of women's

284 most recent deliveries within the last two years preceding the survey [5]. Third, the complex survey  
285 design and sampling weights in the analysis accounted for both descriptive and analytics methods  
286 that enabled us to generalize our findings to the population of WRA in Cambodia. In addition,  
287 DHS data were collected using validated survey methods and highly trained data collectors,  
288 contributing to improved data quality [27]. Last, to our knowledge, this is the first study to report  
289 the association between health insurance coverage and ANC visits in Cambodia. After controlling  
290 sociodemographic factors, we found significant associations between health insurance coverage  
291 and several forums or more ANC visits. A key finding compares the association with other studies  
292 in Southeast Asia and globally.  
293



294 Despite this, there are several limitations. First, this study used a secondary analysis, so it did not  
295 address health institution factors of antenatal care utilization and service availability; hence, this  
296 study could not explore the quality of ANC services, though the quality of healthcare services plays  
297 a vital role in patient satisfaction and use. Second, the study's cross-sectional nature could not  
298 assist in the temporal relationship of variables including the number of years since women joined  
299 health insurance on ANC utilization. Therefore, further study should be conducted to identify  
300 factors related to health institutions. In addition, antenatal care utilization should be performed  
301 based on the new WHO guidelines revised in 2016 at the national level [22]. Moreover,  
302 longitudinal studies that address comprehensive variables should be studied. Third, we excluded  
303 other factors, such as maternal complications and women's empowerment indicators, that could  
304 affect the use of maternal care. Lastly, CDHS did not assess a direct measure of maternal health  
305 literacy.

306

## 307 **Conclusion**

308

309 This is the first study to report the association between health insurance coverage and ANC visits  
310 in the healthcare setting in Cambodia. Cambodian pregnant women attend four or more antenatal  
311 care visits, which is slightly high. However, it still needs to be satisfactory. Health among coverage  
312 women of reproductive age in Cambodia is relatively low. Moreover, we found that women with  
313 health insurance, women with education, and being rich in the wealth quintile were strong  
314 predictors of women attending four or more ANC visits. There is a need to pay close attention to  
315 improving the uptake of health insurance among women of reproductive age, especially targeting  
316 women with no education, from low-income families, and women who reside in rural areas.  
317 Policymakers may need to prioritize women of reproductive age in designing and implementing  
318 health insurance programs to increase their uptake. This would provide financial risk protection,  
319 facilitate access to maternal health services, and possible attainment of Cambodia's SDG 3 targets.

320

## 321 **Acknowledgments**

322 The authors would like to thank DHS-ICF, who approved the data used for this paper.

323

## 324 **References**

- 325 1. National Institute of Statistics, Directorate General for Health, and ICF International. Cambodia  
326 Demographic and Health Survey 2014. Phnom Penh, Cambodia, and Rockville, Maryland, USA: National  
327 Institute of Statistics, Directorate General for Health, and ICF International. Available online:  
328 <https://dhsprogram.com/pubs/pdf/fr312/fr312.pdf>. 2015.
- 329 2. National Institute of Statistics PP, Cambodia, Ministry of Health Phnom Penh, Cambodia, The DHS  
330 Program, ICF, Rockville, Maryland, USA. Cambodia Demographic and Health Survey 2021–22. Phnom  
331 Penh, Cambodia, and Rockville, Maryland, USA: NIS, MoH, and ICF. 2022. Available from:  
332 <https://dhsprogram.com/pubs/pdf/FR377/FR377.pdf>.
- 333 3. The United Nations Development Programme. The Sustainable Development Goals by 2016-2030.  
334 Available from: <https://www.undp.org/content/undp/en/home/sustainable-development-goals.html>.
- 335 4. Acuin CS, Khor GL, Liabsuetrakul T, Achadi EL, Htay TT, Firestone R, et al. Maternal, neonatal,  
336 and child health in southeast Asia: towards greater regional collaboration. *Lancet*. 2011;377(9764):516-25.  
337 Epub 20110125. doi: 10.1016/s0140-6736(10)62049-1. PubMed PMID: 21269675; PubMed Central  
338 PMCID: PMCPMC7159081.
- 339 5. National Institute of Statistics (NIS) MoHM, and ICF. . Cambodia Demographic and Health Survey  
340 2021–22 Final Report. Phnom Penh, Cambodia, and Rockville, Maryland, USA: NIS, MoH, and ICF. 2023.  
341 Available from: <https://dhsprogram.com/pubs/pdf/PR136/PR136.pdf>.
- 342 6. Merga BT, Raru TB, Deressa A, Regassa LD, Gamachu M, Negash B, et al. The effect of health  
343 insurance coverage on antenatal care utilizations in Ethiopia: evidence from national survey. *Front Health*  
344 *Serv*. 2023;3:1101164. Epub 20231006. doi: 10.3389/frhs.2023.1101164. PubMed PMID: 37869683;  
345 PubMed Central PMCID: PMCPMC10587574.
- 346 7. Aboagy RG, Okyere J, Ahinkorah BO, Seidu AA, Zegeye B, Amu H, et al. Health insurance  
347 coverage and timely antenatal care attendance in sub-Saharan Africa. *BMC Health Serv Res*.  
348 2022;22(1):181. Epub 20220211. doi: 10.1186/s12913-022-07601-6. PubMed PMID: 35148769; PubMed  
349 Central PMCID: PMCPMC8840787.
- 350 8. Wang W, Gheda Temsah, and Lindsay Mallick. . Health Insurance Coverage and Its Impact on  
351 Maternal Health Care Utilization in Low- and Middle-Income Countries. DHS Analytical Studies No. 45.  
352 Rockville, Maryland, USA: ICF International. . 2014.
- 353 9. Ahuru RR, Omon IJ, Nzopotam CI, Ekomozeor E. Health insurance ownership and maternal health  
354 service uptake among Nigerian women. *HEALTH*. 2021;12.
- 355 10. National Institute of Statistics. Ministry of Planning. General population census of the Kingdom of  
356 Cambodia 2019. Available from:  
357 [https://www.nis.gov.kh/nis/Census2019/Final%20General%20Population%20Census%202019-  
358 English.pdf](https://www.nis.gov.kh/nis/Census2019/Final%20General%20Population%20Census%202019-English.pdf).
- 359 11. The World Bank In Cambodia. Overview 2019. Available from:  
360 <https://www.worldbank.org/en/country/cambodia/overview>.
- 361 12. World Health Organization (WHO). Global Health Expenditure Database 2019. Available from:  
362 [https://apps.who.int/nha/database/PHC\\_Country\\_profile/Index/en](https://apps.who.int/nha/database/PHC_Country_profile/Index/en).
- 363 13. World Health Organization (WHO); World Bank and WHO. Half the world lacks access to essential  
364 health services, 100 million still pushed into extreme poverty because of health expenses 2017. 2017.  
365 Available from: <http://www.who.int/mediacentre/news/releases/2017/half-lacks-access/en/>.
- 366 14. National Social Security Fund (NSSF). Health Insurance Scheme 2016. Available from:  
367 <https://www.nssf.gov.kh/health-care-scheme-2/>.
- 368 15. Nakamura H, Amimo F, Yi S, Tuot S, Yoshida T, Tobe M, et al. Implementing a sustainable health  
369 insurance system in Cambodia: a study protocol for developing and validating an efficient household  
370 income-level assessment model for equitable premium collection. *Int J Equity Health*. 2020;19(1):17. Epub  
371 20200131. doi: 10.1186/s12939-020-1126-8. PubMed PMID: 32005237; PubMed Central PMCID:  
372 PMCPMC6995079.
- 373 16. The Royal Government of Cambodia. National Social Protection Policy Framework 2016–2025.  
374 Phnom Penh: The Council of Ministers; 2017.

- 375 17. Likka MH, Handalo DM, Weldsilase YA, Sinkie SO. The effect of community-based health  
376 insurance schemes on utilization of healthcare services in low- and middle-income countries: a systematic  
377 review protocol of quantitative evidence. *JBIS Database System Rev Implement Rep.* 2018;16(3):653-61.  
378 doi: 10.11124/jbisrir-2017-003381. PubMed PMID: 29521866.
- 379 18. Dajo J, Ahinkorah BO, Yaya S. Health insurance coverage and antenatal care services utilization  
380 in West Africa. *BMC Health Serv Res.* 2022;22(1):311. Epub 20220307. doi: 10.1186/s12913-022-07698-  
381 9. PubMed PMID: 35255895; PubMed Central PMCID: PMC8899447.
- 382 19. Hooley B, Afriyie DO, Fink G, Tediosi F. Health insurance coverage in low-income and middle-  
383 income countries: progress made to date and related changes in private and public health expenditure. *BMJ*  
384 *Glob Health.* 2022;7(5). doi: 10.1136/bmjgh-2022-008722. PubMed PMID: 35537761; PubMed Central  
385 PMCID: PMC89092126.
- 386 20. Ministry of Health. Guideline for implementation the service package of Antenatal Care Delivery  
387 and Post natal Care 2019 [updated 2019]. 3:[Available from:  
388 [https://niph.org.kh/niph/uploads/library/pdf/GL220\\_NMCHC\\_anc\\_pnc\\_package\\_eng.pdf](https://niph.org.kh/niph/uploads/library/pdf/GL220_NMCHC_anc_pnc_package_eng.pdf).
- 389 21. Imo CK, De Wet-Billings N, Isiugo-Abanihe UC. The impact of maternal health insurance coverage  
390 and adequate healthcare services utilisation on the risk of under-five mortality in Nigeria: a cross-sectional  
391 study. *Arch Public Health.* 2022;80(1):206. Epub 20220913. doi: 10.1186/s13690-022-00968-2. PubMed  
392 PMID: 36100949; PubMed Central PMCID: PMC89472384.
- 393 22. WHO Guidelines Approved by the Guidelines Review Committee. WHO Recommendations on  
394 Antenatal Care for a Positive Pregnancy Experience. Geneva: World Health Organization
- 395 Copyright © World Health Organization 2016.; 2016.
- 396 23. Ministry of Information. Government Raises Allowances For Mothers And Children. Available  
397 from: <https://www.information.gov.kh/articles/108509>.
- 398 24. Chham S, Radovich E, Buffel V, Ir P, Wouters E. Determinants of the continuum of maternal health  
399 care in Cambodia: an analysis of the Cambodia demographic health survey 2014. *BMC Pregnancy*  
400 *Childbirth.* 2021;21(1):410. Epub 20210602. doi: 10.1186/s12884-021-03890-7. PubMed PMID:  
401 34078318; PubMed Central PMCID: PMC8170811.
- 402 25. Lee HY, Oh J, Kim R, Subramanian SV. Long-term trend in socioeconomic inequalities and  
403 geographic variation in the utilization of antenatal care service in India between 1998 and 2015. *Health*  
404 *Serv Res.* 2020;55(3):419-31. Epub 20200304. doi: 10.1111/1475-6773.13277. PubMed PMID: 32133652;  
405 PubMed Central PMCID: PMC7240766.
- 406 26. Thakkar N, Alam P, Saxena D. Factors associated with underutilization of antenatal care in India:  
407 Results from 2019-2021 National Family Health Survey. *PLoS One.* 2023;18(5):e0285454. Epub 20230508.  
408 doi: 10.1371/journal.pone.0285454. PubMed PMID: 37155665; PubMed Central PMCID:  
409 PMC810166529.
- 410 27. Allen C, Fleuret J, Ahmed J, editors. Data quality in demographic and health surveys that used long  
411 and short questionnaires2020: ICF.

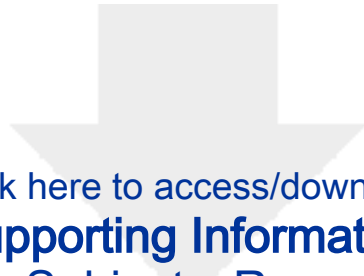

Click here to access/download

**Supporting Information**

PLOSONe\_Human\_Subjects\_Research\_Checklist.docx

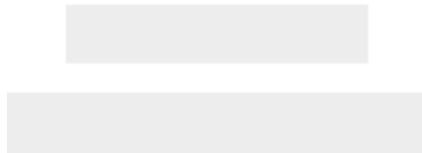

1 **The effect of health insurance coverage ~~and on~~ antenatal care utilization in Cambodia: A**  
 2 **secondary analysis of Cambodia Demographic and Health Survey 2021-2022**

3  
 4 Samnang Um<sup>1,2\*</sup>, Channnarong Phan<sup>1</sup>, Khun Vaha<sup>3</sup>, Soklim Pay<sup>4</sup>, Darapheak Chau<sup>1</sup>

- 5  
 6 1- National Institute of Public Health, Cambodia  
 7 2- Faculty of Social Science and Humanities, Royal University of Phnom Penh, Cambodia  
 8 3- Department of Payment Certification of National Payment Certification Agency, Cambodia  
 9 4- Technical Department of National Pediatric Hospital, Cambodia

10  
 11 \* [umsamng56@gmail.com](mailto:umsamng56@gmail.com)

12  
 13 **Abstract**

14  
 15 Health insurance is essential in reducing or eliminating the financial constraint to accessing  
 16 maternal health services caused by out-of-pocket payments. ~~Also, it~~ has a beneficial effect in  
 17 minimizing the number of maternal and child mortality. ~~However, limited studies in Cambodia~~  
 18 ~~examined the association between health insurance coverage on antenatal care (ANC) utilization.~~  
 19 ~~Therefore, this study was~~ We examined the ~~impact-effect~~ of health insurance coverage ~~and on~~  
 20 ~~antenatal care (ANC) utilization in Cambodia. The study utilized~~ ~~We used~~ data from the 2021-  
 21 ~~2022~~ Cambodia Demographic and Health Surveys (CDHS). A total of 3,162 weighted women who  
 22 gave birth within two years were included in the study. ~~Multiple logistic regression analysis was~~  
 23 ~~explored to assess t~~The association between health insurance coverage ~~and on with pregnant~~  
 24 women who attended ~~at least four or more antenatal care~~ANC visits, ~~during their pregnancy was~~  
 25 ~~evaluated using multiple logistic regression analysis.~~ About 24.9% of ~~the~~ women had health  
 26 insurance coverage during 2021-~~2022~~. Most (86.1%) of women attended ~~at least four4 or more~~  
 27 ANC visits. ~~Almost 91.6% of women participating in four or more ANC visits were covered by~~  
 28 ~~health insurance. Women with Having~~ health insurance ~~coverage and attending four or more ANC~~  
 29 ~~visits~~ were statistically significantly ~~associated with women attending at least four or more ANC~~  
 30 ~~visits with an~~ adjusted odds ratio (AOR = 1.6; 95% CI: 1.1–2.4). Other ~~covariates factors~~  
 31 significantly associated ~~with women attended anee of at four~~ or more ANC visits include women  
 32 with higher education (AOR = 3.1; 95% CI: 1.2–7.7), secondary education (AOR = 2.3; 95% CI:  
 33 1.5–3.5), richest households (AOR = 3.2; 95% CI: 1.5-6.8), and richer households (AOR = 1.9;95%  
 34 CI: 1.2-2.8). Pregnant women with health insurance ~~coverage, who had completed at least~~  
 35 ~~secondary education and had a better wealth index~~ were more likely to attend at least four ANC

36 visits. Thus, ~~improving providing~~ health insurance ~~coverage~~, ~~women's economic and education~~  
37 ~~may be essential to improving women's access to maternal health~~ ~~attended ANC utilization services~~  
38 in Cambodia.

39

40 **Key work:** Health insurance, Antenatal care utilization, Pregnant women, Cambodia

41

42

### 43 **Introduction**

44

45 Cambodia's maternal mortality rate has significantly declined in the past decade. Data from the  
46 2021-2022 Cambodia Demographic and Health Surveys (CDHS) show that maternal mortality had  
47 declined dramatically, from 488 to 154 per 100,000 live births between 2000 and 2021-2022 [1,2].  
48 By 2030, the global maternal death ratio is expected to drop to less than 70 per 100,000 live births,  
49 according to Sustainable Development Goal (SDG) 3.1 [3]. This achievement can be attributed to  
50 the country's concerted effort to increase women's access to maternal health services, particularly  
51 the initiative to increase institutional births [4]. Institutional births dramatically increased, from  
52 19.3% to 98%, while the proportion of pregnant women attending four or more antenatal care  
53 (ANC) appointments increased considerably, from 9% to 86.1%, between 2000 and 2021-2022 [5].  
54 In several studies, women who had health insurance had higher rates of using maternal health  
55 treatments, such as timely ANC and attending four or more ANC visits [6-9].

56

57 In 2019, the total population of Cambodia was 15.55 million, with 17.8% living below the national  
58 poverty line [10]. Since 2016, Cambodia has been classified as a lower-middle-income country,  
59 with gross domestic product (GDP) per capita from 302 US dollars in 2000 to 1,625 US dollars in  
60 2021 [11]. Also, current expenditures on health per capita significantly increased from 20 US  
61 dollars in 2000 to 116 US dollars in 2020 [12]. Globally, 50% of people cannot access essential  
62 health services, as the World Bank and World Health Organization (WHO) reported in 2017 [13].

63

64 Cambodian National Social Security Fund (NSSF) has provided health insurance coverage to  
65 formal sector workers [14]. And poor households are covered by the Health Equity Fund (HEF),  
66 the co-financing mechanism of the government and development partners [15]. By 2025, the  
67 government intends to expand the reach of the NSSF health insurance program to include the entire

68 population [16]. [Data from CDHS 2021-2022 indicated that 22% of women and 13% of men aged](#)  
69 [15-49 years have any health insurance, respectively](#). ~~Thus, nearly 70% of the population aged 15-~~  
70 ~~49 reported not covered by health insurance~~ [5]. Health insurance coverage is expected to provide  
71 financial risk protection and reduce disparities in access by facilitating greater uptake of maternal  
72 health services [13]. To our knowledge, limited published peer-reviewed studies assess the  
73 association between health insurance coverage and access to maternal health services among  
74 women of reproductive age in Cambodia using updated data. One prior study on health insurance  
75 coverage and its impact on maternal healthcare utilization in low- and middle-income countries  
76 utilized data from CDHS 2010 [8]. This study included all women and men aged 15-49 and pooled  
77 Demographic and Health Survey (DHS) data in 30 low-and middle-income countries (LMICs) [8].  
78 An additional study aimed to assess levels of health insurance coverage in 30 LMICs and examines  
79 the impact of health insurance status on the use of maternal health care in eight countries spanning  
80 sub-Saharan Africa (Burundi et al., Namibia, and Rwanda), West Asia (Albania), and South and  
81 Southeast Asia (Cambodia and Indonesia) [8]. [Several pieces of evidence on the effect of health](#)  
82 [insurance coverage on ANC utilization have been published](#) [6-9,17-19]; [results indicate that](#)  
83 [women with health insurance coverage had higher odds attended four or more ANC visits than](#)  
84 [those without](#) [6-9,17-19]. Moreover, [those women who reported exposure to media, married](#)  
85 [women, those with high education, those living in wealthy economic families, those who are](#)  
86 [unemployed, and those living in urban areas were also factors associated with attending four or](#)  
87 [more ANC visits](#) [6-9,17-19]. Given the lack of scholarship addressing this health concern among  
88 Cambodian women aged 15-49, we examined the effects of health insurance coverage ~~and on~~  
89 ~~antenatal care (ANC)~~ utilization among ~~pregnant~~ women [who had a live birth in the past two years](#)  
90 in Cambodia. The findings will provide a broader perspective on levels of health insurance  
91 coverage and the impact of health insurance status on the use of maternal health care in Cambodia.  
92 Additionally, the study will enable policymakers to understand better health insurance coverage  
93 among the adult population in Cambodia and proffer suggestions for improving universal health  
94 coverage in Cambodia.

95

## 96 **Material and Methods**

97

### 98 **Ethical statement**

99

100 The CDHS 2021–2022 is publicly available, with all personal identifiers of study participants  
101 removed. Permission to analyze the data was granted by registering with the DHS program website  
102 at (URL: <https://dhsprogram.com/data/available-datasets.cfm>). Written informed consent was  
103 obtained from the parent/guardian of each participant under 18 before data collection. The  
104 Cambodia National Ethics Committee for Human Health Research (NECHR) approved the data  
105 collection tools and procedures for CHDS 2021–2022 for Health Research on 10 May 2021  
106 (Reference number: # 83 NECHR) and ICF's Institutional Review Board (IRB) in Rockville,  
107 Maryland, USA.

108

#### 109 **Data source**

110

111

112 We used data from the most recent CDHS (2021–2022), a household survey conducted every five  
113 years nationally representative of the population [5]. The two-stage stratified cluster sampling  
114 method collected the samples from all provinces. At the first stage, clusters, or enumeration areas  
115 (EAs), that represent the entire country (urban and rural), are randomly selected from the sampling  
116 frame using probability proportional (PPS) to cluster size. In the second stage, a complete listing  
117 of households was selected from each cluster using an equal probability systematic sampling, and  
118 then interviews were conducted with women aged 15–49 years who were born in the five years  
119 preceding the survey in the complete list selected households [5]. In total, 19,496 women aged 15-  
120 49 who had given birth in the last five years were interviewed face-to-face, using the survey  
121 standard questionnaire to collect information from women on several health indicators such as  
122 maternal health care service utilization, maternal and child health, nutrition, and reproductive  
123 health services [5]. Overall, 15,046 women who had not given birth in the past two years were  
124 excluded. Data restriction resulted in women who had a live birth in the past two years in a final  
125 analytic sample of 3,292 women (3,162 weighted women).

126

#### 127 **Measurements**

128

#### 129 **Outcome variable**

130



131 This study's outcome was the number of ANC visits during the last pregnancy among women aged  
132 15-49 years (coded as 0 = less than 4 ANC visits included women who reported no ANC visits  
133 and 1 = four ~~or and~~ more ANC visits) [6,18,20].  
134

### 135 **Independent variables**

136 The primary independent variable is maternal health insurance coverage (coded as 0=no (reference  
137 and 1=yes-vs. no)), including public and private insurance. The confounding variables included  
138 maternal factors: Women's age in years (coded as 1=15-30 (reference) and 2=31-49), mMarital  
139 status (coded as 1=married (reference) and 2=not married), bBirth order (coded as 1=1  
140 (reference), 2=2<sup>nd</sup>, 3<sup>rd</sup>, and 3=4<sup>th</sup> or more), eEducation (coded as 0 = no education (reference),  
141 1=primary, and 2=secondary or higher), oOccupation (coded as 0=not working (reference),  
142 1=professional, 2=sales, or services, 3=agricultural, and 4>manual labor); Individual Household  
143 factors included the hHousehold wealth index (coded as 1=poorest (reference), 2=poorest,  
144 3=medium, 4=richer, and 5=richest) were calculated following the principal component analysis  
145 (PCA) [5]. Cambodia's gGeographical regions were grouped into four categories –(coded as  
146 1=Plains (reference), 2=Tonle Sap, 3=Coastal/Sea, and 4=Mountains), and pPlace of rResidence  
147 (coded as 1=urban (reference) and 2=rural) (rural vs. urban) based on Cambodia's  
148 General Population Census 2019 and adapted from the original CDHS 2021-2022 [5,10].  
149

Formatted: Superscript

### 151 **Statistical analysis**

152  
153 ~~Analyses~~ Statistical analysis ~~were was~~ performed using STATA V17 (StataCorp LLC). We applied  
154 for the CDHS standard sampling weight variable (y005/1,000,000). Then, we used the survey-  
155 specific STATA command "svy" for descriptive and analytical analysis. Women's socio-economic  
156 and demographic characteristics were described using weighted frequency and percentage  
157 distributions.

Formatted: Font: Bold, Italic

Formatted: Font: Bold, Italic

158 Bivariate analysis using Chi-square tests assessed the association between the variables of interest  
159 (maternal and individual household characteristics) and ANC use. All independent variables  
160 associated with ANC use at p-value  $\leq 0.10$ , or that had a potential confounder variable [6,18] were  
161 included in the multiple logistic regression analysis to determine the independent factors related  
162 to ANC use [26]. Multicollinearity between original independent variables was checked, including

163 women's age, number of children ever born, education, wealth index, occupation, marital status,  
164 coverage health insurance, and place of residence. ~~The r~~Result of the evaluating variance inflation  
165 factor (VIF) scores after fitting an Ordinary Least Squares regression model ~~with- t~~The mean value  
166 of VIF was 1.53, which is less than the cutoff point indicating no collinearity correlation among  
167 the independent variables [27].

168

169 **Results**

170

171 **Characteristics of the study population**

172

173 **Table 1** describes the socio-economic and demographic characteristics of the 3,162 women aged 15–49  
 174 born in the last two years preceding the survey. The mean age was 22.2 years old (SD = 4.2 years); the age  
 175 group of 15–29 years old accounted for 94.3%. The majority (95%) were currently married. More than 33.4%  
 176 of women were giving in had -the first birth-order child. Half of the women completed at least secondary  
 177 education, while 10.6% had no formal education. Only 6.5% of workers were professionals, and 31.2%  
 178 were unemployed. Of the sample, 20.7% of women were from the poorest households, and 19.7% were  
 179 from poorer households/families. Sixty-two percent of the women lived in rural areas. Only 786 (24.9%)  
 180 women aged 15–49 had health insurance coverage. 86.1% of women attended at least four 4-ANC visits  
 181 during pregnancy.

182 **Table 1.** Socio-economic and demographic characteristics of women aged 15-49 years with a birth in the  
 183 last two years preceding the survey (N = 3,162 weighted)

184

| Variables                                 | Freq.     | %    |
|-------------------------------------------|-----------|------|
| <b>Mean age at the time of birth (SD)</b> | 22.2(4.2) |      |
| 15-29                                     | 2,982     | 94.3 |
| 30-49                                     | 180       | 5.7  |
| <b>Marital status</b>                     |           |      |
| Married                                   | 3,004     | 95.0 |
| Not married                               | 158       | 5.0  |
| <b>Birth order</b>                        |           |      |
| 1 <sup>st</sup> -child                    | 1055      | 33.4 |
| 2-3 <sup>rd</sup> children                | 1197      | 37.9 |
| 4 <sup>th</sup> child or more -children   | 909       | 28.7 |
| <b>Educational</b>                        |           |      |
| No education                              | 334       | 10.6 |
| Primary                                   | 1253      | 39.6 |
| Secondary                                 | 1361      | 43.0 |
| Higher                                    | 214       | 6.8  |
| <b>Occupation</b>                         |           |      |
| Not working None                          | 986       | 31.2 |
| Professional                              | 205       | 6.5  |
| Sales                                     | 579       | 18.3 |
| Agricultural                              | 445       | 14.1 |
| Services                                  | 76        | 2.4  |
| Manual labor                              | 810       | 25.6 |
| <b>Wealth index</b>                       |           |      |
| Poorest                                   | 655       | 20.7 |
| Poorer                                    | 623       | 19.7 |
| Middle                                    | 626       | 19.8 |

Formatted: Not Superscript/ Subscript

Formatted: Font: 10 pt, Font color: Black, (Asian) Japanese, Ligatures: None

|                                    |      |             |
|------------------------------------|------|-------------|
| Richer                             | 683  | 21.6        |
| Richest                            | 574  | 18.2        |
| <b>Residence</b>                   |      |             |
| Urban                              | 1202 | 38.0        |
| Rural                              | 1960 | 62.0        |
| <b>Region</b>                      |      |             |
| Plain                              | 1532 | 48.5        |
| Tonle Sap                          | 996  | 31.5        |
| Coastal                            | 201  | 6.4         |
| Plateau/Mountain                   | 432  | 13.7        |
| <b>Covered by health insurance</b> |      |             |
| No                                 | 2376 | 75.1        |
| Yes                                | 786  | 24.9        |
| <b>Number of ANC visits</b>        |      |             |
| < 4 ANC                            | 440  | 13.9        |
| ≥ 4 ANC                            | 2722 | <b>86.1</b> |

Formatted Table

Notes: Survey weights are applied to obtain weighted percentages. \*Plains: Phnom Penh, Kampong Cham, Tbong Khmum, Kandal, Prey Veng, Svay Rieng, and Takeo; Tonle Sap: Banteay Meanchey, Kampong Chhnang, Kampong Thom, Pursat, Siem Reap, Battambang, Pailin, and Otdar Meanchey; Coastal/sea: Kampot, Kep, Preah Sihanouk, and Koh Kong; Mountains: Kampong Speu, Kratie, Preah Vihear, Stung Treng, Mondul Kiri, and Ratanak Kiri.

## Maternal health insurance characteristics

The highest proportion of women having health insurance was among those aged 15-30 years (25.3.4%,  $p=0.094$ ); higher education (48.1%,  $p<0.001$ ); worked in professional jobs (59.0%), manual labor (52.5%) with  $p<0.001$ ; and women from the richer households (30.2%), richest households (32.2%) with  $p<0.001$ ; and women in urban areas (35.9%,  $p<0.001$ ); (see Table 2).

Table 2. Socio-economic and demographic characteristics by the health insurance coverage of women aged 15-49 years with a birth in the last two years preceding the survey (N=3,162)

| Variables                                | Covered by health insurance |      |             |      | p-value |
|------------------------------------------|-----------------------------|------|-------------|------|---------|
|                                          | No (N=2,367)                |      | Yes (N=786) |      |         |
|                                          | Freq.                       | %    | Freq.       | %    |         |
| <b>Age at time of birth</b>              |                             |      |             |      |         |
| 15-30                                    | 2,229                       | 74.7 | 753         | 25.3 | 0.094   |
| 31-49                                    | 147                         | 81.7 | 33          | 18.3 |         |
| <b>Marital status</b>                    |                             |      |             |      |         |
| Married                                  | 2,260                       | 75.2 | 744         | 24.8 | 0.757   |
| Not married                              | 116                         | 73.4 | 42          | 26.6 |         |
| <b>Birth order</b>                       |                             |      |             |      |         |
| 1 <sup>st</sup> child                    | 778                         | 73.7 | 277         | 26.3 | 0.035   |
| 2 <sup>nd</sup> or 3 <sup>rd</sup> child | 876                         | 73.2 | 321         | 26.8 |         |
| 4 <sup>th</sup> child or more            | 722                         | 79.4 | 188         | 20.7 |         |
| <b>Educational</b>                       |                             |      |             |      |         |
| No education                             | 269                         | 80.5 | 65          | 19.5 | <0.001  |

|                     |       |      |       |      |        |
|---------------------|-------|------|-------|------|--------|
| Primary             | 950   | 75.8 | 304   | 24.3 |        |
| Secondary           | 1,046 | 76.9 | 315   | 23.1 |        |
| Higher              | 111   | 51.9 | 103   | 48.1 |        |
| <b>Occupation</b>   |       |      |       |      |        |
| None                | 892   | 90.5 | 93    | 9.4  | <0.001 |
| Professional        | 84    | 41.0 | 121   | 59.0 |        |
| Sales               | 514   | 88.8 | 65    | 11.2 |        |
| Agricultural        | 387   | 87.0 | 58    | 13.0 |        |
| Services            | 64    | 84.2 | 12    | 15.8 |        |
| Manual labor        | 385   | 47.5 | 425   | 52.5 |        |
| <b>Wealth index</b> |       |      |       |      |        |
| Poorest             | 537   | 82.0 | 118   | 18.0 | <0.001 |
| Poorer              | 493   | 79.1 | 131   | 21.0 |        |
| Middle              | 479   | 76.5 | 147   | 23.5 |        |
| Richer              | 477   | 69.8 | 206   | 30.2 |        |
| Richest             | 389   | 67.8 | 185   | 32.2 |        |
| <b>Residence</b>    |       |      |       |      |        |
| Urban               | 770   | 64.1 | 432   | 35.9 | <0.001 |
| Rural               | 1,606 | 81.9 | 354   | 18.1 |        |
| <b>Region</b>       |       |      |       |      |        |
| Plain               | 1,119 | 73.0 | 413   | 27.0 | 0.019  |
| Tonle Sap           | 781   | 78.4 | 216   | 21.7 |        |
| Coastal             | 167   | 83.1 | 34    | 16.9 |        |
| - Plateau/Mountain  | 309.0 | 71.5 | 123.0 | 28.5 | -      |

Notes: Survey weights are applied to obtain weighted percentages. \*Plains: Phnom Penh, Kampong Cham, Tbong Khmum, Kandal, Prey Veng, Svay Rieng, and Takeo; Tonle Sap: Banteay Meanchey, Kampong Chhnang, Kampong Thom, Pursat, Siem Reap, Battambang, Pailin, and Oddar Meanchey; Coastal/sea: Kampot, Kep, Preah Sihanouk, and Koh Kong; Mountains: Kampong Speu, Kratie, Preah Vihear, Stung Treng, Mondul Kiri, and Ratanak Kiri.

Formatted Table

202  
203  
204  
205  
206  
207

208 **Factors Associated with Four or more ANC visits in Chi-Square analysis**

209  
210  
211 In bivariate analysis (**Table 3**), a higher proportion of women with health insurance coverage had a  
212 significant association with four or more ANC visits (91.6% vs. 84.2%,  $p < 0.001$ ). Women aged 31–49  
213 reported being more likely to attend four or more ANC visits (88.0% vs. 86.0%,  $p < 0.001$ ). Also, married  
214 women reported four or more ANC visits than nonmarried women (86.6% vs. 76.2%,  $p = 0.007$ ). Women  
215 with no education were less likely to attend four or more ANC visits than those with higher education (71.0%  
216 vs. 95.6%,  $p < 0.001$ ). Four or more ANC visits were higher among women working in professional (95.3%)  
217 and service (96.4%), respectively, compared to unemployed women (84.3), with  $p < 0.001$ ). Additionally,  
218 four or more ANC visits were higher among women from the richer and richest on the wealth index (94.8  
219 and 89.4%, respectively), compared to the poorer and poorest (73.9 and 86.9%, respectively, with  $p < 0.001$ ).  
220 Lastly, women living in urban areas reported higher four or more ANC visits than in rural areas (91.5 vs.  
221 82.7%,  $p < 0.001$ ).

222  
223 **Table 3.** Maternal and household characteristics by women attending at least four antenatal care and delivery in  
224 a health facility (N = 3,162)  
225

| Variables                                                 | Number of ANC visits    |                         | p-value |
|-----------------------------------------------------------|-------------------------|-------------------------|---------|
|                                                           | Four or more<br>n=2,722 | Less than four<br>n=440 |         |
|                                                           | %                       | %                       |         |
| <b>Covered by health insurance</b>                        |                         |                         |         |
| No                                                        | 84.2                    | 15.8                    | <0.001  |
| Yes                                                       | 91.6                    | 8.4                     |         |
| <b>Age at time of birth</b>                               |                         |                         |         |
| 15-30                                                     | 86.0                    | 14.0                    | <0.001  |
| 31-49                                                     | 88.0                    | 12.0                    |         |
| <b>Marital status</b>                                     |                         |                         |         |
| Married                                                   | 86.6                    | 13.4                    | 0.007   |
| Not married                                               | 76.2                    | 23.8                    |         |
| <b>Birth order</b>                                        |                         |                         |         |
| 1 <sup>st</sup> child                                     | 88.4                    | 11.6                    | <0.001  |
| 2 <sup>nd</sup> - <del>or</del> -3 <sup>rd</sup> children | 88.6                    | 11.4                    |         |
| 4 <sup>th</sup> - <del>child</del> or more children       | 80.1                    | 19.9                    |         |
| <b>Educational</b>                                        |                         |                         |         |
| No education                                              | 71.0                    | 29.0                    | <0.001  |
| Primary                                                   | 84.1                    | 15.9                    |         |
| Secondary                                                 | 90.1                    | 9.9                     |         |
| Higher                                                    | 95.6                    | 4.4                     |         |
| <b>Occupation</b>                                         |                         |                         |         |
| Not working                                               | 84.3                    | 15.7                    | <0.001  |

|                     |      |      |        |
|---------------------|------|------|--------|
| Professional        | 95.3 | 4.7  |        |
| Sales               | 84.4 | 15.6 |        |
| Agricultural        | 79.0 | 21.0 |        |
| Services            | 96.4 | 3.6  |        |
| Manual labor        | 89.9 | 10.1 |        |
| <b>Wealth index</b> |      |      |        |
| Poorest             | 73.9 | 26.1 | <0.001 |
| Poorer              | 86.9 | 13.1 |        |
| Middle              | 86.3 | 13.7 |        |
| Richer              | 89.4 | 10.6 |        |
| Richest             | 94.8 | 5.2  |        |
| <b>Residence</b>    |      |      |        |
| Urban               | 91.5 | 8.5  | <0.001 |
| Rural               | 82.7 | 17.3 |        |
| <b>Region</b>       |      |      |        |
| Plain               | 89.3 | 10.7 | <0.001 |
| Tonle Sap           | 86.6 | 13.4 |        |
| Coastal             | 89.0 | 11.0 |        |
| Plateau/Mountain    | 72.2 | 27.8 |        |

226 *Notes: Survey weights are applied to obtain weighted percentages. \*Plains: Phnom Penh, Kampong Cham, Tbong Khmum, Kandal,*  
227 *Prey Veng, Svay Rieng, and Takeo; Tonle Sap: Banteay Meanchey, Kampong Chhnang, Kampong Thom, Pursat, Siem Reap,*  
228 *Battambang, Pailin, and Otdar Meanchey; Coastal/sea: Kampot, Kep, Preah Sihanouk, and Koh Kong; Mountains: Kampong Speu,*  
229 *Kratie, Preah Vihear, Stung Treng, Mondul Kiri, and Ratanak Kiri.*  
230  
231  
232  
233

234 **Association between health insurance and maternal Healthcare Services Utilization**  
 235

236 **Table 4** shows the results of the multiple logistic regression analysis of the association between  
 237 health insurance coverage and maternal healthcare services utilization after controlling for the  
 238 socio-demographic factors. Compared to women without health insurance, those with health  
 239 insurance coverage were more likely to attend four or more ANC visits (AOR = 1.6, 95% CI: 1.1–  
 240 2.4). Women with higher education (AOR = 3.1, 95% CI: 1.2–7.7), secondary education (AOR =  
 241 2.3, 95% CI: 1.5–3.5), and primary education (AOR = 1.7, 95% CI: 1.2–2.7) were more likely to  
 242 have four or more ANC visits than women without any formal education. The odds of having four  
 243 or more ANC visits were more significant for women from the wealthiest households than for  
 244 those from the poorest households: richest households (AOR = 3.2; 95% CI: 1.5-6.8), richer  
 245 households (AOR = 1.9; 95% CI: 1.2-2.8), and middle households (AOR = 1.5; 95% CI: 1.1-2.2).  
 246 However, the odds of having four or more ANC visits were lower in unmarried women than in  
 247 married women (AOR = 0.5; 95% CI: 0.3-0.8).  
 248

249 **Table 4.** Association between health insurance and four or more ANC visits in simple and multiple logistic  
 250 regression model (N = 3,162)

| Variables                                   | Four or more ANC visits  |            |                          |           |
|---------------------------------------------|--------------------------|------------|--------------------------|-----------|
|                                             | Unadjusted               |            | Adjusted                 |           |
|                                             | OR                       | 95% CI     | AOR                      | 95% CI    |
| <b>Covered by health insurance</b>          |                          |            |                          |           |
| No                                          | <a href="#">Ref. 1.0</a> |            | <a href="#">Ref. 1.0</a> |           |
| Yes                                         | 2.0***                   | (1.4-2.9)  | 1.6*                     | (1.1-2.4) |
| <b>Age at time of birth</b>                 |                          |            |                          |           |
| 15-30                                       | <a href="#">Ref. 1.0</a> |            | <a href="#">Ref. 1.0</a> |           |
| 31-49                                       | 1.2                      | (0.7-2.1)  | 1.1                      | (0.6-2.0) |
| <b>Marital status</b>                       |                          |            |                          |           |
| Married                                     | <a href="#">Ref. 1.0</a> |            | <a href="#">Ref. 1.0</a> |           |
| Not married                                 | 0.5**                    | (0.3-0.8)  | 0.5**                    | (0.3-0.8) |
| <b>Birth order</b>                          |                          |            |                          |           |
| 1 <sup>st</sup> -child                      | <a href="#">Ref. 1.0</a> |            | <a href="#">Ref. 1.0</a> |           |
| 2 <sup>nd</sup> or 3 <sup>rd</sup> children | 1.0                      | (0.8-1.4)  | 1.1                      | (0.8-1.5) |
| 4 <sup>th</sup> child or more children      | 0.5***                   | (0.4-0.7)  | 0.7*                     | (0.5-1.0) |
| <b>Educational</b>                          |                          |            |                          |           |
| No education                                | <a href="#">Ref. 1.0</a> |            | <a href="#">Ref. 1.0</a> |           |
| Primary                                     | 2.2***                   | (1.5-3.1)  | 1.8**                    | (1.2-2.7) |
| Secondary                                   | 3.7***                   | (2.6-5.3)  | 2.3***                   | (1.5-3.5) |
| Higher                                      | 8.9***                   | (4.3-18.3) | 3.1*                     | (1.2-7.7) |
| <b>Occupation</b>                           |                          |            |                          |           |
| <a href="#">Not working</a> None            | <a href="#">Ref. 1.0</a> |            | <a href="#">Ref. 1.0</a> |           |
| Professional                                | 3.8***                   | (2.0-7.0)  | 1.4                      | (0.7-2.8) |



|                     |                        |            |                        |           |
|---------------------|------------------------|------------|------------------------|-----------|
| Sales               | 1.0                    | (0.7-1.4)  | 0.7                    | (0.5-1.0) |
| Agricultural        | 0.7*                   | (0.5-1.0)  | 1.0                    | (0.7-1.4) |
| Services            | 4.9**                  | (1.8-13.5) | 2.6                    | (0.9-7.2) |
| Manual labor        | 1.7**                  | (1.2-2.3)  | 1.3                    | (0.9-1.9) |
| <b>Wealth index</b> |                        |            |                        |           |
| Poorest             | <a href="#">Ref.††</a> |            | <a href="#">Ref.††</a> |           |
| Poorer              | 2.4***                 | (1.7-3.2)  | 1.7**                  | (1.2-2.3) |
| Middle              | 2.2***                 | (1.6-3.1)  | 1.5*                   | (1.1-2.2) |
| Richer              | 3.0***                 | (2.1-4.2)  | 1.9***                 | (1.2-2.8) |
| Richest             | 6.4***                 | (3.4-12.0) | 3.2**                  | (1.5-6.8) |
| <b>Residence</b>    |                        |            |                        |           |
| Urban               | <a href="#">Ref.††</a> |            | <a href="#">Ref.††</a> |           |
| Rural               | 0.4***                 | (0.3-0.6)  | 0.8                    | (0.5-1.1) |
| <b>Region</b>       |                        |            |                        |           |
| Plain               | <a href="#">Ref.††</a> |            | <a href="#">Ref.††</a> |           |
| Tonle Sap           | 0.8                    | (0.6-1.1)  | 1.2                    | (0.9-1.7) |
| Coastal             | 1.0                    | (0.6-1.5)  | 1.3                    | (0.8-2.1) |
| Plateau/Mountain    | 0.3***                 | (0.2-0.4)  | 0.5***                 | (0.3-0.6) |

Ref = reference value

\*  $p < 0.05$ , \*\*  $p < 0.01$ , \*\*\*  $p < 0.001$

Notes: Survey weights are applied to obtain weighted percentages. \*Plains: Phnom Penh, Kampong Cham, Tbong Khmum, Kandal, Prey Veng, Svay Rieng, and Takeo; Tonle Sap: Banteay Meanchey, Kampong Chhnang, Kampong Thom, Pursat, Siem Reap, Battambang, Pailin, and Otdar Meanchey; Coastal/sea: Kampot, Kep, Preah Sihanouk, and Koh Kong; Mountains: Kampong Speu, Kratie, Preah Vihear, Stung Treng, Mondul Kiri, and Ratanak Kiri.

## Discussion

We analyzed the most recent 2021–2022 CDHS data to examine the relationship between health insurance coverage and receiving four or more ANC visits during pregnancy. Overall, 24.9% of women reported having health insurance coverage among women of reproductive age who gave birth within two years of the survey. This finding is slightly similar to lower-middle-income countries, where 27.3% of women had health insurance coverage [19]. This is higher than in low-income countries, where 7.9% of women have health insurance coverage [19]. However, lower than in upper-middle-income countries, 52.5% of women had health insurance coverage [19]. Since the formal launch of the Cambodia National Social Security Fund (NSSF) with the Health Insurance Scheme in 2008, the proportion of women with health insurance coverage has increased from 16% in 2014 to 22% in 2021–2022 [5]. This proportion exponentially increased due to the Royal Government of Cambodia’s implementation of the NSSF for all workers in the formal and informal sectors of the economy [10]. Moreover, it has plans to extend the healthcare benefits under the NSSF to the family members of the employees as well [16].

276 The proportion of women with health insurance coverage was found to be highest among women  
277 with higher levels of education and those from better households. This is in line with a meta-  
278 analysis of 48 studies conducted in 17 countries, which revealed a higher likelihood of health  
279 insurance participation in the wealthiest and most educated households [21]. Additionally, women  
280 with higher educational levels and wealth status consistently predicted health insurance ownership  
281 among women at reproductive age across five Sub-Saharan African countries [22]. Furthermore,  
282 we found women with health insurance coverage, a lower proportion among women living in rural  
283 areas. Consistent with studies in Nigeria [9]. This suggests that the more vulnerable populations,  
284 such as the poor, rural areas, and least educated, should be reached with government interventions  
285 such as having health insurance coverage.

286 The proportion of pregnant women attending four or more antenatal care appointments has  
287 increased considerably from 9% to 86.1% between 2000 and 2021. This study found that women  
288 with health insurance coverage were 1.6 times more likely to attend four or more ANC visits during  
289 pregnancy. Previous studies documented the positive relationship between health insurance and  
290 the number of ANC visits among women of reproductive age [8,9,19]. Health insurance eliminates  
291 the financial barrier to accessing maternal health services caused by out-of-pocket payments. It  
292 has a beneficial effect in reducing the number of low-birth-weight babies born and child mortality  
293 [17,23]. The result is more equitable access to care, potentially improving maternal health  
294 outcomes [9,19]. The MoH has since raised the minimum standard for ANC visits during  
295 pregnancy to at least four trips [20,24]. The dramatically significant increase in the highest  
296 prevalence of four or more ANC visits was an effort by the Royal Government of Cambodia, which  
297 has strengthened health facilities across the country, particularly in rural areas, improved  
298 infrastructure, provided essential medical equipment and supplies, increased the number of  
299 midwives, expanded antenatal care, and provided more skilled medical practitioners at childbirth  
300 to ensure safe delivery practices. Furthermore, to encourage early and routine ANC visits, the  
301 government is offering pregnant women a monetary incentive of [US\\$20 US dollars](#) for each visit  
302 during a maximum of four ANC visits at any health facility with a contract with the National Social  
303 Security Fund (NSSF) [14,25].

304  
305 This study found that increased education and household wealth index increased the likelihood of  
306 four or more ANC visits. Women's education and higher wealth index are more likely to attend

307 four or more ANC visits. This aligns with previous evidence around socio-economic inequalities  
308 in maternal health service utilization in Cambodia and South Asia [26,27]. This may be because  
309 the more educated the woman is, the more aware she is of the importance of ANC for her health  
310 and baby [28]. Additionally, education gives women the power to decide whether to seek medical  
311 attention and enables them to recognize warning signs of pregnancy complications. Moreover,  
312 ~~the other hand,~~ women from higher-income households were more likely to be able to cover the  
313 costs of care-seeking, including any related expenses and transportation [26,27]. Thus, in this study,  
314 women with higher education levels and household wealth indexes had the highest proportion of  
315 health insurance coverage.

316  
317 This study has several strengths. First, it used the most recent women's data from the 2021–2022  
318 CDHS, an extensive representative national population-based household survey with a high  
319 response rate of 97%. Second, the recall bias has been minimized by limited analysis of women's  
320 most recent deliveries within the last two years preceding the survey [5]. ~~Data were collected using~~  
321 ~~validated survey methods and highly trained data collectors, contributing to improved data quality~~  
322 [29]. Third, the complex survey design and sampling weights in the analysis accounted for both  
323 descriptive and analytics methods that enabled us to generalize our findings to the population of  
324 WRA in Cambodia. ~~In addition, DHS data were collected using validated survey methods and~~  
325 ~~highly trained data collectors, contributing to improved data quality~~ [29]. Lastly, to our knowledge,  
326 this is the first study to report the association between health insurance coverage and ANC visits  
327 in Cambodia. After controlling sociodemographic factors, we found significant associations  
328 between health insurance coverage and several forums or more ANC visits. A key finding  
329 compares the association with other studies in Southeast Asia and globally.

330

331 Despite this, there are several limitations. First, this study ~~was—used~~ a [secondary](#)  
332 [analysis household-based survey](#), so it did not address health institution factors of antenatal care  
333 utilization and service availability; hence, this study could not explore the quality of ANC services,  
334 though the quality of healthcare services plays a vital role in patient satisfaction and use. Second,  
335 the study's cross-sectional nature could not assist in the temporal relationship of variables [including](#)  
336 [the number of years since women joined health insurance on ANC utilization](#). Therefore, further  
337 study should be conducted to identify factors related to health institutions. In addition, antenatal  
338 care utilization should be performed based on the new WHO guidelines [revised in 2016](#) at the  
339 national level [24].

340 Moreover, longitudinal studies that address comprehensive variables should be studied. Third, we  
341 excluded other factors, such as maternal complications and women's empowerment indicators, that  
342 could affect the use of maternal care. Lastly, CDHS did not assess a direct measure of maternal  
343 health literacy.

344

#### 345 **Conclusion**

346

347 This is the first study to report the association between health insurance coverage and ANC visits  
348 in the healthcare setting in Cambodia. Cambodian pregnant women attend four or more antenatal  
349 care visits, which is slightly high. However, it still needs to be satisfactory. **Health among coverage**  
350 **women of reproductive age in Cambodia is relatively low.** Moreover, we found that women with  
351 health insurance, women with education, and being rich in the wealth quintile were strong  
352 predictors of women attending four or more ANC visits. There is a need to pay close attention to  
353 improving the uptake of health insurance among women of reproductive age, especially targeting  
354 women with no education, from low-income families, and women who reside in rural areas.  
355 Policymakers may need to prioritize women of reproductive age in designing and implementing  
356 health insurance programs to increase their uptake. This would provide financial risk protection,  
357 facilitate access to maternal health services, and possible attainment of Cambodia's SDG 3 targets.

358

#### 359 **Acknowledgments**

360 The authors would like to thank DHS-ICF, who approved the data used for this paper.

361

362 **References**

- 363 1. National Institute of Statistics, Directorate General for Health, and ICF International. Cambodia  
364 Demographic and Health Survey 2014. Phnom Penh, Cambodia, and Rockville, Maryland, USA: National  
365 Institute of Statistics, Directorate General for Health, and ICF International. Available online:  
366 <https://dhsprogram.com/pubs/pdf/fr312/fr312.pdf>. 2015.
- 367 2. National Institute of Statistics PP, Cambodia, Ministry of Health Phnom Penh, Cambodia, The DHS  
368 Program, ICF, Rockville, Maryland, USA. Cambodia Demographic and Health Survey 2021–22. Phnom  
369 Penh, Cambodia, and Rockville, Maryland, USA: NIS, MoH, and ICF. 2022. Available from:  
370 <https://dhsprogram.com/pubs/pdf/FR377/FR377.pdf>.
- 371 3. The United Nations Development Programme. The Sustainable Development Goals by 2016-2030.  
372 Available from: <https://www.undp.org/content/undp/en/home/sustainable-development-goals.html>.
- 373 4. Acuin CS, Khor GL, Liabsuetrakul T, Achadi EL, Htay TT, Firestone R, et al. Maternal, neonatal,  
374 and child health in southeast Asia: towards greater regional collaboration. *Lancet*. 2011;377(9764):516-25.  
375 Epub 20110125. doi: 10.1016/s0140-6736(10)62049-1. PubMed PMID: 21269675; PubMed Central  
376 PMCID: PMCPMC7159081.
- 377 5. National Institute of Statistics (NIS) MoHM, and ICF. . Cambodia Demographic and Health Survey  
378 2021–22 Final Report. Phnom Penh, Cambodia, and Rockville, Maryland, USA: NIS, MoH, and ICF. 2023.  
379 Available from: <https://dhsprogram.com/pubs/pdf/PR136/PR136.pdf>.
- 380 6. Merga BT, Raru TB, Deressa A, Regassa LD, Gamachu M, Negash B, et al. The effect of health  
381 insurance coverage on antenatal care utilizations in Ethiopia: evidence from national survey. *Front Health*  
382 *Serv*. 2023;3:1101164. Epub 20231006. doi: 10.3389/frhs.2023.1101164. PubMed PMID: 37869683;  
383 PubMed Central PMCID: PMCPMC10587574.
- 384 7. Aboagye RG, Okyere J, Ahinkorah BO, Seidu AA, Zegeye B, Amu H, et al. Health insurance  
385 coverage and timely antenatal care attendance in sub-Saharan Africa. *BMC Health Serv Res*.  
386 2022;22(1):181. Epub 20220211. doi: 10.1186/s12913-022-07601-6. PubMed PMID: 35148769; PubMed  
387 Central PMCID: PMCPMC8840787.
- 388 8. Wang W, Gheda Temsah, and Lindsay Mallick. . Health Insurance Coverage and Its Impact on  
389 Maternal Health Care Utilization in Low- and Middle-Income Countries. *DHS Analytical Studies No. 45*.  
390 Rockville, Maryland, USA: ICF International. . 2014.
- 391 9. Ahuru RR, Omon II, Nzopotam CI, Ekomoezor E. Health insurance ownership and maternal health  
392 service uptake among Nigerian women. *HEALTH*. 2021;12.
- 393 10. National Institute of Statistics. Ministry of Planning. General population census of the Kingdom of  
394 Cambodia 2019. Available from:  
395 [https://www.nis.gov.kh/nis/Census2019/Final%20General%20Population%20Census%202019-  
396 English.pdf](https://www.nis.gov.kh/nis/Census2019/Final%20General%20Population%20Census%202019-English.pdf).
- 397 11. The World Bank In Cambodia. Overview 2019. Available from:  
398 <https://www.worldbank.org/en/country/cambodia/overview>.
- 399 12. World Health Organization (WHO). Global Health Expenditure Database 2019. Available from:  
400 [https://apps.who.int/nha/database/PHC\\_Country\\_profile/Index/en](https://apps.who.int/nha/database/PHC_Country_profile/Index/en).
- 401 13. World Health Organization (WHO); World Bank and WHO. Half the world lacks access to essential  
402 health services, 100 million still pushed into extreme poverty because of health expenses 2017. 2017.  
403 Available from: <http://www.who.int/mediacentre/news/releases/2017/half-lacks-access/en/>.
- 404 14. National Social Security Fund (NSSF). Health Insurance Scheme 2016. Available from:  
405 <https://www.nssf.gov.kh/health-care-scheme-2/>.
- 406 15. Nakamura H, Amimo F, Yi S, Tuot S, Yoshida T, Tobe M, et al. Implementing a sustainable health  
407 insurance system in Cambodia: a study protocol for developing and validating an efficient household  
408 income-level assessment model for equitable premium collection. *Int J Equity Health*. 2020;19(1):17. Epub  
409 20200131. doi: 10.1186/s12939-020-1126-8. PubMed PMID: 32005237; PubMed Central PMCID:  
410 PMCPMC6995079.

- 411 16. The Royal Government of Cambodia. National Social Protection Policy Framework 2016–2025.  
412 Phnom Penh: The Council of Ministers; 2017.
- 413 17. Likka MH, Handalo DM, Weldsilase YA, Sinkie SO. The effect of community-based health  
414 insurance schemes on utilization of healthcare services in low- and middle-income countries: a systematic  
415 review protocol of quantitative evidence. *JBIS Database System Rev Implement Rep.* 2018;16(3):653-61.  
416 doi: 10.11124/jbisrir-2017-003381. PubMed PMID: 29521866.
- 417 18. Dadjo J, Ahinkorah BO, Yaya S. Health insurance coverage and antenatal care services utilization  
418 in West Africa. *BMC Health Serv Res.* 2022;22(1):311. Epub 20220307. doi: 10.1186/s12913-022-07698-  
419 9. PubMed PMID: 35255895; PubMed Central PMCID: PMC8899447.
- 420 19. Hooley B, Afriyie DO, Fink G, Tediosi F. Health insurance coverage in low-income and middle-  
421 income countries: progress made to date and related changes in private and public health expenditure. *BMJ*  
422 *Glob Health.* 2022;7(5). doi: 10.1136/bmjgh-2022-008722. PubMed PMID: 35537761; PubMed Central  
423 PMCID: PMC89092126.
- 424 20. Ministry of Health. Guideline for implementation the service package of Antenatal Care Delivery  
425 and Post natal Care 2019 [updated 2019]. 3:[Available from:  
426 [https://niph.org.kh/niph/uploads/library/pdf/GL220\\_NMCHC\\_anc\\_pnc\\_package\\_eng.pdf](https://niph.org.kh/niph/uploads/library/pdf/GL220_NMCHC_anc_pnc_package_eng.pdf).  
427 21. Osei Afriyie D, Krasniq B, Hooley B, Tediosi F, Fink G. Equity in health insurance schemes  
428 enrollment in low and middle-income countries: A systematic review and meta-analysis. *Int J Equity Health.*  
429 2022;21(1):21. Epub 20220212. doi: 10.1186/s12939-021-01608-x. PubMed PMID: 35151323; PubMed  
430 Central PMCID: PMC8841076.
- 431 22. Shao L, Wang Y, Wang X, Ji L, Huang R. Factors associated with health insurance ownership  
432 among women of reproductive age: A multicountry study in sub-Saharan Africa. *PLoS One.*  
433 2022;17(4):e0264377. Epub 20220412. doi: 10.1371/journal.pone.0264377. PubMed PMID: 35413063;  
434 PubMed Central PMCID: PMC89004737.
- 435 23. Imo CK, De Wet-Billings N, Isiugo-Abanihe UC. The impact of maternal health insurance coverage  
436 and adequate healthcare services utilisation on the risk of under-five mortality in Nigeria: a cross-sectional  
437 study. *Arch Public Health.* 2022;80(1):206. Epub 20220913. doi: 10.1186/s13690-022-00968-2. PubMed  
438 PMID: 36100949; PubMed Central PMCID: PMC89472384.
- 439 24. WHO Guidelines Approved by the Guidelines Review Committee. WHO Recommendations on  
440 Antenatal Care for a Positive Pregnancy Experience. Geneva: World Health Organization
- 441 Copyright © World Health Organization 2016.; 2016.
- 442 25. Ministry of Information. Government Raises Allowances For Mothers And Children. Available  
443 from: <https://www.information.gov.kh/articles/108509>.
- 444 26. Chham S, Radovich E, Buffel V, Ir P, Wouters E. Determinants of the continuum of maternal health  
445 care in Cambodia: an analysis of the Cambodia demographic health survey 2014. *BMC Pregnancy*  
446 *Childbirth.* 2021;21(1):410. Epub 20210602. doi: 10.1186/s12884-021-03890-7. PubMed PMID:  
447 34078318; PubMed Central PMCID: PMC8170811.
- 448 27. Lee HY, Oh J, Kim R, Subramanian SV. Long-term trend in socioeconomic inequalities and  
449 geographic variation in the utilization of antenatal care service in India between 1998 and 2015. *Health*  
450 *Serv Res.* 2020;55(3):419-31. Epub 20200304. doi: 10.1111/1475-6773.13277. PubMed PMID: 32133652;  
451 PubMed Central PMCID: PMC7240766.
- 452 28. Thakkar N, Alam P, Saxena D. Factors associated with underutilization of antenatal care in India:  
453 Results from 2019-2021 National Family Health Survey. *PLoS One.* 2023;18(5):e0285454. Epub 20230508.  
454 doi: 10.1371/journal.pone.0285454. PubMed PMID: 37155665; PubMed Central PMCID:  
455 PMC810166529.
- 456 29. Allen C, Fleuret J, Ahmed J, editors. Data quality in demographic and health surveys that used long  
457 and short questionnaires2020: ICF.

## Authors' point-by-point responses to the editor and reviewers

Manuscript ID: PGPH-D-24-00222

Manuscript Titled: Health insurance coverage and antenatal care utilization in Cambodia: Analysis of Cambodia Demographic and Health Survey 2021-22

PLOS Global Public Health

**Dear editor and reviewers,**

We would like to thank all the reviewers and editor for providing their important time and effort in reviewing our manuscript. We have addressed all comments where relevant, as listed below:

### **1. Additional Editor Comments:**

This paper tried to examine the effects of health insurance coverage and antenatal care (ANC) utilization among pregnant women in Cambodia. Although the reviewers raised some concerns regarding this paper. My major concern is the analysis regarding the table 4 multiple logistic regression model where the authors showed a significant relationship among the insured and non-insured mother regarding the recommended ANC service utilization. The authors conclude compared to women without health insurance, those with health insurance coverage were 1.6 times more likely to attend four or more ANC visits. However, Table 4 also indicated that, most of the explanatory variables have a positive relationship with outcome variables. Even we observed that richest and higher educated mother utilized 3.2 and 3.1 times higher than their counterpart which is higher than having insurance variable. Therefore, I wondered education and wealth more important than having health insurances. Please clarify? The paper is fine, if the authors change the title of this paper to find out the determinants of ANC service utilization using Cambodia DHS data. However, to examine the effect of health insurance, I would like to see the reanalysis with two separate models for the mothers who were belonged to the health insurance coverage and who have not. Indeed, without propensity score matching, I believed the impact of health insurance on ANC service utilization may be questionable. See the related papers

**Author's response:** On page 1 of the manuscript, we have adopted and modified the title accordingly, and now reads “The effect of health insurance coverage on antenatal care utilization in Cambodia: A secondary analysis of Cambodia Demographic and Health Survey 2021-2022”.

**Author's response:** We have revised the manuscript to explain the concerns with the result presented in “Table 4 multiple logistic regression model” To check for a high correlation among the independent variables, a test for multicollinearity was carried out among independent variables was checked before fitting the final multiple logistic regression model, including coverage health insurance, women's age,

number of children ever born, education, wealth index, occupation, marital status, and place of residence. The result of the evaluating variance inflation factor (VIF) scores after fitting an Ordinary Least Squares regression model with the mean value of VIF was 1.53, which is less than the cutoff point indicating no collinearity correlation among the independent variables. Next, a multiple logistic regression was conducted to examine the independent association between health insurance coverage and other covariates on ANC utilization. The selection of variables into the multiple logistic regression model was based on the previously published papers provided in reference numbers #6, #18 and their statistical significance in the Chi-square test at  $p\text{-value} \leq 0.10$ .

**Authors' response:** We have asked professional editing services to revise and make corrections grammatically and accordingly, as suggested.

## 2. Reviewers' comments:

**Reviewer #1:** please correct 15-59 years as 15-49 years in line number 116 (page 4). Complete the line 133 -descriptive and analytical analysis or something like this. Make the line 141 correct, there is no verb in this sentence. Rewrite the sentence /line number149. Correct/rewrite line number 257,258. Read carefully the full text.

**Authors' response:** We have revised the manuscript accordingly.

**Reviewer #2:** Thank you for sharing the manuscript and would like to congratulate them for their nice work. My few comments/clarification questions are incorporated in the manuscript.

1. Did the study assess the cut-off period to identify the association between access to maternal health and years of membership/participation in health insurance?

**Authors' response:** cut-off period or years of membership/participation in health insurance were not included in the CDHS 2022 questionnaire.

2. What is the particular interest of the researchers only using 2021-2022 data?

**Authors' response:** The results are more reliable and reflect the current situation among women in Cambodia. Moreover, the findings of the study on the effect of health insurance coverage on antenatal care utilization are similar to other studies (for example, references #6, and #18), and the result can be used as a baseline value for comparison in the future.

3. How do you assess the confounding effects of other variables such as income, and level of education? Because those with better education and income are likely to attend 4 or more ANC visits.

**Authors' response:**



The multicollinearity test was carried out among independent variables that were checked before fitting the final multiple logistic regression model, including coverage health insurance, women's age, number of children ever born, education, wealth index, occupation, marital status, and place of residence. The result of the evaluating variance inflation factor (VIF) scores after fitting an Ordinary Least Squares regression model with the mean value of VIF was 1.53, which is less than the cutoff point indicating no collinearity correlation among the independent variables.

Next, a multiple logistic regression was conducted to examine the independent association between health insurance coverage and other covariates on ANC utilization.

The selection of variables into the multiple logistic regression model was based on the previously published papers provided in reference numbers #6, #18 and their statistical significance in the Chi-square test at  $p\text{-value} \leq 0.10$ .

For instance, according to multiple logistic regression models with an interaction term between wealth index and education, there is no association between several ANC visits and wealth and education.

4. Just for curiosity, is those women who did not attend any ANC visit categorized under less than 4 ANC visit?

**Authors' response:** less than 4 ANC visits were included in women who reported no ANC visits.

5. Did the study assess the association between the number of years since they joined the insurance and ANC use?

**Authors' response:** the number of years since they joined the health insurance was not included in the CDHS 2022 questionnaire. This is a limitation of the study.

**Reviewer #3:** Thank you for the opportunity to review this manuscript titled "Health insurance coverage and antenatal care utilization in Cambodia: Analysis of Cambodia Demographic and Health Survey 2021-22"

Title: I can see that title has two outcome variables (Health insurance coverage and ANC utilization) and no independent variable. It would be better to have this put to look a complete topic. Example; you can write, "Factors Associated with Health Insurance and ANC Utilization....."

**Author's response:** We have modified the title accordingly, and now reads "The effect of health insurance coverage on antenatal care utilization in Cambodia: A secondary analysis of Cambodia Demographic and Health Survey 2021-2022".

Methods: In the outcome variable section you stated that "This study's outcome was the number of ANC visits..." I can see that you left out another important outcome variable, i.e Health

Insurance Coverage. Please update this section. Further, I can see that you used these two outcome variables very well in your result section (see Table 2 & Table 3).

**Author's response:** To clarify the outcome variable was women attended four or more ANC visits. Now, Table 2 removed.

Results: Update your topic that reflect the independent variables used in result. I gave a suggestion how the title can be improved.

**Author's response:** To clarify, now we have modified the title accordingly “The effect of health insurance coverage on antenatal care utilization in Cambodia: A secondary analysis of Cambodia Demographic and Health Survey 2021-2022”. Table 2 removed.

Data sharing: Write a statement on data related to your study and indicate the URL link for the data

**Author's response:** We have revised the manuscript accordingly. *“The Demographic and Health Survey data are publicly available from the website: (URL: [https://www.dhsprogram.com/data/dataset\\_admin](https://www.dhsprogram.com/data/dataset_admin)) and are accessible after registration on the website. The authors did not have special access privileges.”*

**Reviewer #4:** The manuscript adequately responds to the research question based on the predefined scope. This is a secondary analysis of data from a demographic and health survey. The author should be keen not to describe the survey in the methodology instead of the approaches of the current study. Minor comments are included in the attached manuscript for author review.

**Author's response:** We have revised the manuscript accordingly as following all reviewers suggested.

**Reviewer #5:** I am glad to have had the opportunity to review this pertinent and interesting paper. The paper addresses a relevant issue, both socially and scientifically; however, I believe some changes could clarify and improve the current manuscript. Please find my comments below:

**Author's response:** We have revised the manuscript accordingly as following all reviewers suggested.
